# Supplementary material for: How do care environments shape healthcare? A synthesis of qualitative studies among healthcare workers during the COVID-19 pandemic
Source: PubMed Central journal article supplement — BMJ Open. 2022 Sep 28;12(9):e063867. doi: 10.1136/bmjopen-2022-063867 (PMC9527744; doi:10.1136/bmjopen-2022-063867), 2022-09-28
Supplement: bmjopen-2022-063867.draft_revisions.pdf [file bmjopen-2022-063867.draft_revisions.pdf]

# BMJ Open

BMJ Open is committed to open peer review. As part of this commitment we make the peer review history of every article we publish publicly available.

When an article is published we post the peer reviewers' comments and the authors' responses online. We also post the versions of the paper that were used during peer review. These are the versions that the peer review comments apply to.

The versions of the paper that follow are the versions that were submitted during the peer review process. They are not the versions of record or the final published versions. They should not be cited or distributed as the published version of this manuscript.

BMJ Open is an open access journal and the full, final, typeset and author-corrected version of record of the manuscript is available on our site with no access controls, subscription charges or pay-per-view fees (<http://bmjopen.bmj.com>).

If you have any questions on BMJ Open's open peer review process please email [info.bmjopen@bmj.com](mailto:info.bmjopen@bmj.com)

# BMJ Open

## How do care environments shape healthcare? A synthesis of qualitative studies among healthcare workers during the COVID-19 pandemic

|                               |                                                                                                                                                                                                                                                                                                              |
|-------------------------------|--------------------------------------------------------------------------------------------------------------------------------------------------------------------------------------------------------------------------------------------------------------------------------------------------------------|
| Journal:                      | <i>BMJ Open</i>                                                                                                                                                                                                                                                                                              |
| Manuscript ID                 | bmjopen-2022-063867                                                                                                                                                                                                                                                                                          |
| Article Type:                 | Original research                                                                                                                                                                                                                                                                                            |
| Date Submitted by the Author: | 14-Apr-2022                                                                                                                                                                                                                                                                                                  |
| Complete List of Authors:     | Harrison, Mia; University of New South Wales, Centre for Social Research in Health<br>Rhodes, Tim; University of New South Wales, Centre for Social Research in Health; London School of Hygiene & Tropical Medicine<br>Lancaster, Kari; University of New South Wales, Centre for Social Research in Health |
| Keywords:                     | COVID-19, Quality in health care < HEALTH SERVICES ADMINISTRATION & MANAGEMENT, QUALITATIVE RESEARCH, INTENSIVE & CRITICAL CARE                                                                                                                                                                              |
|                               |                                                                                                                                                                                                                                                                                                              |

SCHOLARONE™  
Manuscripts

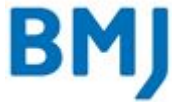

I, the Submitting Author has the right to grant and does grant on behalf of all authors of the Work (as defined in the below author licence), an exclusive licence and/or a non-exclusive licence for contributions from authors who are: i) UK Crown employees; ii) where BMJ has agreed a CC-BY licence shall apply, and/or iii) in accordance with the terms applicable for US Federal Government officers or employees acting as part of their official duties; on a worldwide, perpetual, irrevocable, royalty-free basis to BMJ Publishing Group Ltd ("BMJ") its licensees and where the relevant Journal is co-owned by BMJ to the co-owners of the Journal, to publish the Work in this journal and any other BMJ products and to exploit all rights, as set out in our [licence](#).

The Submitting Author accepts and understands that any supply made under these terms is made by BMJ to the Submitting Author unless you are acting as an employee on behalf of your employer or a postgraduate student of an affiliated institution which is paying any applicable article publishing charge ("APC") for Open Access articles. Where the Submitting Author wishes to make the Work available on an Open Access basis (and intends to pay the relevant APC), the terms of reuse of such Open Access shall be governed by a Creative Commons licence – details of these licences and which [Creative Commons](#) licence will apply to this Work are set out in our licence referred to above.

Other than as permitted in any relevant BMJ Author's Self Archiving Policies, I confirm this Work has not been accepted for publication elsewhere, is not being considered for publication elsewhere and does not duplicate material already published. I confirm all authors consent to publication of this Work and authorise the granting of this licence.

**TITLE**

How do care environments shape healthcare? A synthesis of qualitative studies among healthcare workers during the COVID-19 pandemic

**CORRESPONDING AUTHOR**

Mia Harrison

Centre for Social Research in Health, University of New South Wales, High St, Kensington, NSW 2052, Australia.

[mia.harrison@unsw.edu.au](mailto:mia.harrison@unsw.edu.au)

**AUTHOR 1**

Mia Harrison

- 1) Centre for Social Research in Health, University of New South Wales, Sydney, Australia

**AUTHOR 2**

Tim Rhodes

- 1) Centre for Social Research in Health, University of New South Wales, Sydney, Australia
- 2) London School of Hygiene & Tropical Medicine, London, United Kingdom

**AUTHOR 3**

Kari Lancaster

- 1) Centre for Social Research in Health, University of New South Wales, Sydney, Australia

**WORD COUNT**

7545

## ABSTRACT

**Objective:** To investigate how care is shaped through the material practices and spaces of healthcare environments during the COVID-19 pandemic.

**Design:** Critical interpretive synthesis of qualitative research.

**Participants:** Studies included qualitative research investigating the experiences of healthcare workers involved in the care of individuals during the COVID-19 pandemic.

**Results:** 134 articles were identified in the initial sampling frame with 38 studies involving 2507 participants included in the final synthesis. Three themes were identified in the analysis: 1) the hospital transformed; 2) virtual care spaces; and 3) objects of care. Through the generation of these themes, a synthesising argument was developed to demonstrate how material spaces and practices of healthcare shape care delivery and to provide insights to support healthcare providers in creating enabling and resilient care environments.

**Conclusions:** The findings of this study demonstrate how healthcare environments enable and constrain modes of care. Practices of care are shaped through the materiality of spaces and objects, including how these change in the face of pandemic disruption. The implication is that the healthcare environment needs to be viewed as a critical adaptive element in the optimisation of care. The study also develops a versatile and coherent approach to critical interpretive synthesis methods that can be taken up in future research.

**Keywords:** COVID-19, quality in health care, qualitative research, intensive & critical care

## ARTICLE SUMMARY

### Strengths and Limitations of This Study

- This study is the first to synthesise qualitative research during the COVID-19 pandemic on how the materiality of healthcare environments shape practices of care.

- This study demonstrates a cogent working approach to critical interpretive synthesis methods for review of qualitative research, which helps to generate insights beyond the goals of the original studies.
- Included studies were primarily limited to the earlier stages of the COVID-19 pandemic and inconsistently defined COVID-19 care and treatment.
- The analysis highlights the importance of developing adaptable environments as part of systemic responses in times of emergency such as pandemics.

## INTRODUCTION

This paper investigates how the materiality of the healthcare environment shapes care experiences, and how care practices and spaces transform in uncertain health contexts. Taking the COVID-19 pandemic as our case, this review synthesises qualitative studies investigating the experiences of healthcare workers involved in the care of patients during the COVID-19 pandemic. While these studies attend to COVID-19 in an 'emergency' framing, they call attention to enduring concerns that will affect healthcare practices and spaces in the years to come. The COVID-19 context presents an opportunity to identify the ways through which the materiality of the care environment enables and constrains ways of doing healthcare with particular attention to care as an emergent and adaptive feature of its environment and situation.[1-4] This work is important, not only for considering how care is adapted in fast-moving situations of disruption such as emergency, but also for how adaptive responses to care can endure as part of a systemic response.[2]

Existing reviews into the experiences of healthcare workers during the COVID-19 pandemic have primarily focused on the mental health impacts of COVID-19 on healthcare workers (and interventions and strategies for coping), and other barriers to and adaptations for care including those related to resource allocation, access to relevant information and

1  
2  
3 training, the impacts of wearing personal protective equipment (PPE), stigma, and logistical  
4  
5 challenges, particularly around infection control and prevention.[5-18] Another review  
6  
7 examined the impacts of environments on workers in the COVID-19 context more broadly,  
8  
9 including the environments of healthcare workers.[19] To investigate this further, we trace  
10  
11 how aspects of the healthcare environment (that is, the sites, spaces, and conditions  
12  
13 through which care is delivered and/or received) shape the healthcare experience,  
14  
15 particularly in uncertain or rapidly changing health contexts. We consider ways of  
16  
17 identifying how healthcare workers can be better supported not only *in* but *through* their  
18  
19 environments. We finally explore how healthcare services might develop up efforts to  
20  
21 create enabling and resilient environments of care for healthcare workers as well as  
22  
23 patients.  
24  
25  
26  
27  
28  
29

30 This analysis has practical implications, as the forms of care provided by healthcare  
31  
32 workers, as well as the quality of such care, are contingent on how healthcare environments  
33  
34 adapt to changing health needs and contexts. The effects of this adaptability are  
35  
36 compounded in times of emergency and disruption. Our orientation in this synthesis is  
37  
38 informed by recent work on materialities and ecologies of care[20-24] and how the care  
39  
40 environment affects the care delivery experience.[25-29] To our knowledge, this is the first  
41  
42 synthesis of qualitative research to consider how healthcare environments materially affect  
43  
44 the delivery of COVID-19 care.  
45  
46  
47  
48

## 49 **METHODOLOGY**

50  
51 We draw upon Dixon-Woods et al.'s methods for critical interpretive synthesis (CIS) of  
52  
53 qualitative research to develop our approach to review.[30] Dixon-Woods et al. argue that  
54  
55 while conventional comprehensive review methods are useful for aggregative syntheses of  
56  
57 data, they present limitations when it comes to *interpretive* approaches to synthesising "a  
58  
59  
60

1  
2  
3 large and complex body of evidence.”[30] A critical interpretive approach to synthesising  
4  
5 qualitative evidence is useful because it does not merely describe issues identified within  
6  
7 the original studies, but also generates new ideas and “assemble[s] findings into a form that  
8  
9 is useful in informing policy.”[30] Such an approach requires a sample that is *rich* and  
10  
11 *diverse*, rather than exhaustive, as the focus is on generating theory rather than  
12  
13 systematically summarising all available data.[30-32] CIS is thus more concerned with  
14  
15 “*appropriateness of sampling*” than “*comprehensiveness*.”[31] This requires an iterative and  
16  
17 flexible approach to review, where the research question, sampling strategy, and analysis  
18  
19 are continuously and reflexively refined.[30, 33] The aim here is to develop insights that  
20  
21 move beyond the designs of the original studies and have the capacity to produce novel  
22  
23 contributions to health policy and clinical practice.  
24  
25  
26  
27  
28

29  
30 Guided by Dixon-Woods et al.’s methods, we have outlined each step of our  
31  
32 approach to synthesis below.[30] It should be noted that these steps are not necessarily  
33  
34 performed sequentially or independently. Instead, steps may overlap, run concurrently, and  
35  
36 repeat in response to emerging analysis and theory generation.  
37  
38  
39

#### 40 **Review Question**

41  
42 We established an analytical focus for our review around the materiality of the healthcare  
43  
44 environment. By this, we mean we attended to matter, such as objects (both medical and  
45  
46 mundane), bodies, buildings, and infrastructures, and how matter relates with practices,  
47  
48 knowledges, spaces, temporalities, and affects in the care environment.[20, 21] We  
49  
50 furthermore considered how the care environment itself is made through these relations  
51  
52 and what is at stake in that making.[20, 21] This analytical focus guided our search and was  
53  
54 iteratively refined in response to emerging findings.[30] Unlike with conventional review  
55  
56  
57  
58  
59  
60



1  
2  
3 methodologies, and in keeping with CIS methods, we did not formulate a hypothesis in  
4  
5 advance, but reflexively refined the research question and analysis throughout.[30]  
6  
7

### 8 **Search Strategy**

9  
10 An explicit, highly structured, and protocol-driven search strategy is ill-suited to the review  
11  
12 of complex qualitative evidence, as it risks missing relevant materials and can be less  
13  
14 efficient than other strategies.[30, 34] We combined traditional search strategies with  
15  
16 other, more iterative methods to assemble a sampling frame. We began with a search of  
17  
18 PubMed and Google Scholar databases using the search query “(healthcare OR (health AND  
19  
20 care)) AND (worker OR professional OR staff) AND covid-19 AND qualitative.” These search  
21  
22 terms were kept intentionally broad to allow for greater inclusivity across topics and  
23  
24 disciplines in line with the exploratory nature of the review process.<sup>10</sup> Further searches were  
25  
26 also performed in hand selected journals and via backwards and forwards citation chaining,  
27  
28 using Google Scholar for the latter. Finally, we used informal networks such as personal  
29  
30 contacts and Twitter to monitor for additional literature that may have been missed in the  
31  
32 initial search, especially given the fast-moving production of research in the COVID-19  
33  
34 context.[30, 34] We adopted a “snowballing” approach to our search, allowing studies that  
35  
36 emerged throughout the review process to be included in the final sample.[34]  
37  
38  
39  
40  
41  
42  
43

### 44 **Eligibility Criteria**

45  
46 In the early stages of study selection, it was important keep the boundaries of our search  
47  
48 flexible to allow the review question to dynamically evolve in response to emerging findings.  
49  
50 However, given the speed and volume of research being produced within the COVID-19  
51  
52 context, there was a practical need to limit the number of papers included in the initial  
53  
54 review. Eligible articles included English-language original studies collecting primary  
55  
56 qualitative data including interviews, surveys with free-text responses, focus groups, and  
57  
58  
59  
60

1  
2  
3 observation. Mixed-method studies were eligible for inclusion if evidence of all findings was  
4 demonstrated in the qualitative data. All articles were peer reviewed and published or in  
5  
6 press with the accepted manuscript available online by 31st December 2021.  
7  
8  
9

10 Eligible studies investigated the experiences of healthcare workers involved in the  
11 care of individuals with COVID-19. This posed two challenges. First, the category of  
12 healthcare workers has no singular definition across studies and geographical contexts, with  
13 some articles taking a broad approach and some focusing on specific professions. We  
14 adopted an inclusive definition of healthcare workers including, but not limited to, medical  
15 and paramedical practitioners, nurses, midwives, allied health professionals, emergency  
16 health workers, personal care workers, health management and support personnel,  
17 students and trainees, and other health and health associate professionals.  
18  
19  
20  
21  
22  
23  
24  
25  
26  
27  
28  
29

30 Second, in the context of the pandemic, where the healthcare systems of most  
31 countries are directly involved in COVID-19 management and care, it is difficult to define  
32 what constitutes COVID-19 care. Healthcare workers in settings that are not established to  
33 provide specific COVID-19 care may still encounter individuals experiencing COVID-19 illness  
34 who are also, or solely, in need of non-COVID-19 healthcare. Conversely, healthcare workers  
35 who are explicitly engaged in the care of patients with COVID-19 are often also involved in  
36 care of other patients who are not infected and have other healthcare needs. Most studies  
37 did not make clear and consistent distinctions between practices of care performed for  
38 patients with and without COVID-19, and the experiences of healthcare workers related to  
39 the specific care of COVID-19 patients cannot be disentangled from the broader experiences  
40 of providing healthcare during the COVID-19 pandemic. Furthermore, many of the concerns  
41 and practices of frontline COVID-19 healthcare workers and other healthcare workers are  
42 shared, including managing infection risks and the use of PPE.  
43  
44  
45  
46  
47  
48  
49  
50  
51  
52  
53  
54  
55  
56  
57  
58  
59  
60

1  
2  
3 We included articles that explicitly reported the experiences of caring for individuals  
4  
5 with confirmed or suspected COVID-19, irrespective of whether COVID-19 care was a  
6  
7 primary responsibility of the study participants. We additionally included studies in which  
8  
9 there was ambiguity as to whether the participants themselves were involved in the *direct*  
10  
11 care of COVID-19 patients, but the practices, spaces, and concerns identified in the findings  
12  
13 were consistent with other studies. Studies that did not focus on the experiences of  
14  
15 healthcare workers in care *provision* (e.g. studies investigating experiences of healthcare  
16  
17 workers as COVID-19 patients themselves) were excluded.  
18  
19  
20  
21  
22

### 23 **Sampling and Quality Determination**

24  
25 We employed an iterative and purposive sampling strategy to select papers for inclusion.  
26  
27 Rather than producing an exhaustive sample within a rigid and highly specified inclusion  
28  
29 criteria, purposive sampling enables the inclusion of “relevant” literature on the basis of  
30  
31 likelihood to contribute to the development of theory, with an ultimate aim of “conceptual  
32  
33 saturation.”[30, 33] This allows for the inclusion of a richer and more diverse sample of  
34  
35 literature. Thomas and Harden argue that aiming for conceptual saturation may be more  
36  
37 appropriate for reviewing qualitative literature than traditional sampling approaches, as the  
38  
39 conceptual findings of the synthesis will not change with the addition of further studies  
40  
41 beyond the point of saturation.[35]  
42  
43  
44  
45  
46

47 CIS rejects a “stage” approach to review, instead producing a method that is  
48  
49 iterative, dynamic, and responsive to the evolving concerns of the synthesis.[30] In practice,  
50  
51 this involved including and excluding literature on an ongoing basis to adapt to emerging  
52  
53 lines of analytical inquiry. The aim here is not reproducibility.[30] Instead, much like with  
54  
55 analysis of data in primary qualitative research, CIS methods produce an interpretation of  
56  
57 the evidence that is demonstrably grounded and prioritises “meaningful” analysis.[30] While  
58  
59  
60

total transparency of study selection is not feasible within such a method, we have simplified our selection process into 4 phases (Table 1).

| <b>Table 1: Phases of Sampling</b> |                                                                                                                                                                                                                                         |
|------------------------------------|-----------------------------------------------------------------------------------------------------------------------------------------------------------------------------------------------------------------------------------------|
| Phase 1                            | Articles were screened for eligibility and relevance on the basis of titles and abstracts. Selected articles were imported with PDFs into EndNote 20 for full-text indexing (n=134).                                                    |
| Phase 2                            | A sample of articles (n=53) was read in full and emerging themes were identified, coded, and synthesised into possible search terms with particular attention to our analytical interest in the materiality of healthcare environments. |
| Phase 3                            | All indexed PDFs were searched using synthesised search terms and matching articles were screened for inclusion on the basis of the full text for quality, richness of primary data, and relevance (n=96).                              |
| Phase 4                            | All articles included in Phase 3 were screened for final inclusion on the basis of contribution to theory development (n=38).                                                                                                           |

While the phases of sampling represented in Table 1 are listed in sequential order, Phase 2 and Phase 3 are not a discrete and singular steps, but rather “a constant dialectic process conducted concurrently with theory generation.”[30] Search terms synthesised in Phase 2 were continuously tested for usefulness and refined in response to emerging themes (Table 2); for example, despite the attention to material objects within the synthesis, “material” was determined to be an unhelpful search term as it captured all articles that referenced “supplementary materials.” Similarly, articles selected in Phase 1

were iteratively included and excluded on the basis of relevance in Phase 3 as the concerns of the synthesis evolved.

**Table 2: Synthesised Search Terms**

| Search Term(s)                            | Sample (N) |
|-------------------------------------------|------------|
| bed                                       | 75         |
| body OR bodies OR bodily                  | 68         |
| disinfect                                 | 25         |
| dispose OR disposal                       | 9          |
| facility OR facilities                    | 61         |
| gear                                      | 33         |
| mask                                      | 93         |
| ppe                                       | 101        |
| redeploy                                  | 26         |
| room                                      | 90         |
| space OR spatial                          | 58         |
| telehealth OR teleconsult OR telemedicine | 23         |
| ventilator                                | 46         |
| virtual OR digital OR remote              | 70         |
| war OR battle OR soldier                  | 62         |
| waste                                     | 12         |
| zone                                      | 23         |

Following Dixon-Woods et al., we adopted an approach to quality appraisal in Phase 3 that maximised inclusion at a conceptual level, rather than taking a hierarchical approach

determined by particular methodological standards.[30] Though articles would only be *included* on the basis of their interpretive value, articles would also only be *excluded* if they were deemed to be “fatally flawed.”[30] We developed a set of appraisal prompts adapted from those proposed by Dixon-Woods et al. for assessing if an article should be excluded on this basis (Table 3).[30] Finally, Phase 4 of the sampling process appraised all articles included in Phase 3 for their overall contribution to the conceptual findings of the review. As the methodological aim of this review was to reach “conceptual saturation,” we deemed it unnecessary to include multiple articles that all presented the same findings without meaningful variation. Articles that produced no additional insights to other included articles and did not provide rich empirical data for interpretive analysis were excluded in this phase (Table 4).

**Table 3: Quality Appraisal Prompts**

|                                                                    |
|--------------------------------------------------------------------|
| Are the objectives of the research clearly stated?                 |
| Is the research design clearly described and appropriate?          |
| Are data collection methods transparent?                           |
| Are data analysis methods clearly described and appropriate?       |
| Are there sufficient data to support the authors’ interpretations? |

**Table 4: Study Characteristics**

| Author (Date)            | Aims                                                                                                                  | Country or Region | Sample (N)* | Qualitative Data Collection Method*  |
|--------------------------|-----------------------------------------------------------------------------------------------------------------------|-------------------|-------------|--------------------------------------|
| Al Ghafri et al. (2020)  | To explore the experiences and perceptions of medical professionals working frontline in the management of COVID-19   | Oman              | 40          | Focus groups                         |
| Arnetz et al. (2020)     | To explore perceptions of stress for nurses working in the early stages of the COVID-19 pandemic                      | United States     | 455         | Survey with free-text response       |
| Aughterson et al. (2020) | To explore the psychosocial impact of the COVID-19 pandemic on frontline health and social care workers               | United Kingdom    | 25          | Semi-structured interviews           |
| Baldwin & George (2021)  | To develop an understanding of the experiences and needs of healthcare workers during and after the COVID-19 outbreak | United Kingdom    | 19          | In-depth, semi-structured interviews |
| Banerjee et              | To explore perceptions, experiences, and challenges                                                                   | India             | 148         | In-depth, semi-                      |

|                                  |                                                                                                                                                              |                |     |                                      |
|----------------------------------|--------------------------------------------------------------------------------------------------------------------------------------------------------------|----------------|-----|--------------------------------------|
| al. (2020)                       | of healthcare workers involved in dementia care during the COVID-19 pandemic                                                                                 |                |     | structured interviews                |
| Billings et al. (2021)           | To explore the experiences, views, and needs of mental health professionals supporting frontline health and social care workers during the COVID-19 pandemic | United Kingdom | 28  | Semi-structured interviews           |
| Blake et al. (2021)              | To evaluate wellbeing centres established to provide psychological support to healthcare workers during the COVID-19 pandemic                                | England        | 24  | Semi-structured interviews           |
| Butler et al. (2020)             | To explore perspectives and experiences of clinicians on resource limitation and patient care during the COVID-19 pandemic                                   | United States  | 60  | Semi-structured interviews           |
| Chandler-Jeanville et al. (2021) | To explore the lived experiences and perceptions of the COVID-19 pandemic amongst frontline nurses and their relatives                                       | France         | 49  | Semi-structured interviews           |
| Chen et al. (2021)               | To explore the experiences of wearing PPE for nurses caring for patients with COVID-19                                                                       | China          | 15  | Semi-structured interviews           |
| Cheong (2020)                    | To explore the impact of the COVID-19 pandemic on hospital-based clinical pharmacists                                                                        | Malaysia       | 19  | Semi-structured interviews           |
| Conlon et al. (2021)             | To understand the experiences of emergency care staff during the COVID-19 pandemic                                                                           | Ireland        | 15  | Semi-structured interviews           |
| Crowe et al. (2021)              | To examine the mental health of critical care nurses providing direct COVID-19 care during the early phase of the pandemic                                   | Canada         | 15  | Semi-structured interviews           |
| Deliktas Demirci et al. (2021)   | To explore the experiences and coping strategies of nurses working on COVID-19 wards                                                                         | Turkey         | 15  | In-depth, semi-structured interviews |
| Digby et al. (2021)              | To investigate the well-being of hospital staff during the early stage of the COVID-19 pandemic                                                              | Australia      | 321 | Survey with free-text response       |
| Fernández-Castillo et al. (2021) | To examine the experiences of intensive care nurses during the COVID-19 pandemic                                                                             | Spain          | 17  | Semi-structured interviews           |
| Galehdar et al. (2020)           | To explore experiences of distress among nurses caring for patients with COVID-19                                                                            | Iran           | 20  | In-depth, semi-structured interviews |
| Hayirli et al. (2021)            | To describe how personal protective equipment and distancing affect teamwork in the emergency setting                                                        | United States  | 55  | Semi-structured interviews           |
| Hoernke et al. (2021)            | To explore the experiences and concerns related to healthcare workers' use of PPE during the COVID-19 pandemic and its impact on care delivery               | United Kingdom | 46  | In-depth, semi-structured interviews |
| Jia et al. (2021)                | To examine nurses' ethical challenges in delivering COVID-19 care                                                                                            | China          | 18  | In-depth, structured interviews      |
| Kurotschka et al. (2021)         | To explore the care experiences of general practitioners during the first phase of the COVID-19 pandemic                                                     | Italy          | 149 | Survey with free-text response       |
| Liberati et al. (2021)           | To investigate the experiences of healthcare workers in secondary mental health services during the COVID-19 pandemic                                        | England        | 35  | Semi-structured interviews           |
| Liu et al. (2020)                | To explore the experiences of healthcare workers recruited to provide direct care for COVID-19 patients                                                      | China          | 13  | In-depth, semi-structured interviews |
| Montgomery et al. (2021)         | To investigate the experiences of healthcare workers in critical care settings during the COVID-19 pandemic                                                  | United Kingdom | 40  | Semi-structured interviews           |
| Ness et al. (2021)               | To investigate challenges faced by healthcare workers during the COVID-19 pandemic                                                                           | United States  | 23  | Semi-structured interviews           |
| Newman et al. (2021)             | To explore the psychological impact of the COVID-19 pandemic on frontline healthcare workers                                                                 | United Kingdom | 395 | Survey with free-text response       |
| Norful et al. (2021)             | To investigate the impact of stress on frontline healthcare workers during the initial outbreak of COVID-19                                                  | United States  | 55  | Open-ended interviews                |
| Palacios-Ceña et al. (2021)      | To examine the experiences of frontline physical therapists during the COVID-19 pandemic                                                                     | Spain          | 30  | In-depth, semi-structured interviews |

|                                                                                                                                                                                                                         |                                                                                                                                           |                |    |                                      |
|-------------------------------------------------------------------------------------------------------------------------------------------------------------------------------------------------------------------------|-------------------------------------------------------------------------------------------------------------------------------------------|----------------|----|--------------------------------------|
| Parsons Leigh et al. (2021)                                                                                                                                                                                             | To investigate the perceptions and experiences of critical care physicians in the context of resource strain during the COVID-19 pandemic | Canada         | 15 | Semi-structured interviews           |
| Pastrana et al. (2021)                                                                                                                                                                                                  | To explore the impact of COVID-19 on palliative care                                                                                      | 41 countries   | 79 | Survey with free-text response       |
| Rao et al. (2021)                                                                                                                                                                                                       | To examine the perspectives of frontline clinicians providing care to patients with COVID-19                                              | United States  | 50 | Semi-structured interviews           |
| Rees et al. (2021)                                                                                                                                                                                                      | To explore the experiences of paramedics providing care during the COVID-19 pandemic                                                      | Wales          | 20 | Semi-structured interviews           |
| Ross et al. (2021)                                                                                                                                                                                                      | To investigate the experiences of paediatric hospital social workers during the COVID-19 pandemic                                         | United States  | 55 | Focus groups                         |
| Saleem et al. (2021)                                                                                                                                                                                                    | To explore the experiences of frontline Pakistani emigrant physicians working in the UK during the COVID-19 pandemic                      | United Kingdom | 10 | In-depth, semi-structured interviews |
| Sheng et al. (2020)                                                                                                                                                                                                     | To explore the impact of involvement in COVID-19 rescue on professional identity among nurses                                             | China          | 14 | Semi-structured interviews           |
| Testoni et al. (2021)                                                                                                                                                                                                   | To examine COVID-19-related stress in doctors and nurses                                                                                  | Italy          | 17 | In-depth, semi-structured interviews |
| Williams Veazey et al. (2021)                                                                                                                                                                                           | To explore how entanglements of affect, space, and evidence shape care in the COVID-19 context                                            | Australia      | 63 | In-depth, semi-structured interviews |
| Yip et al. (2021)                                                                                                                                                                                                       | To examine the experiences of junior nurses providing care to COVID-19 patients in acute care settings                                    | Hong Kong      | 40 | Semi-structured interviews           |
| <i>*For mixed-method studies and studies investigating multiple populations, only primary qualitative data collected from healthcare worker participants (as defined under "Eligibility Criteria") are represented.</i> |                                                                                                                                           |                |    |                                      |

## Data Extraction and Analysis

Data were collected and organised by synthesised search terms (Table 2). Emerging themes were identified across the collected data and a "synthesising argument" was developed.[30]

The goal of the synthesising argument is to make sense of ideas across the review by bringing together arguments and evidence within multiple studies in ways that are explanatory and theoretically generative, and attend to the relationships between constructs.[30] We analysed both the primary data presented within the studies, and the interpretations by the study authors, to generate new interpretative findings (what Dixon-Woods et al. describe as "synthetic constructs").[30] We then generated three themes to organise these synthetic constructs, which allowed us to present our synthesising argument in a way that was internally coherent and facilitated a stronger theoretical understanding of material practices and spaces of healthcare environments.

## Patient and Public Involvement



1  
2  
3 There was no patient or public involvement in this study.  
4

## 5 **FINDINGS**

6  
7  
8 Our synthesising argument is organised across three interconnected themes: 1) the hospital  
9 transformed; 2) virtual care spaces; and 3) objects of care. To present these themes, we  
10  
11 have included illustrative extracts of participant responses from included studies, which are  
12  
13 italicised in-text.  
14  
15  
16

### 17 **Theme 1: The Hospital Transformed**

18  
19 During the COVID-19 pandemic, the hospital environment has undergone spatial, material,  
20  
21 and temporal transformations to accommodate changing healthcare needs. Three distinct  
22  
23 but intersecting burdens on physical space in the hospital setting emerged in the literature:  
24  
25 the increase in hospitalisations in COVID-19-affected geographical locations; the need for  
26  
27 hospital zoning to separate confirmed or suspected COVID-19 cases from other patients;  
28  
29 and the need for general physical distancing between all staff, patients, and visitors in the  
30  
31 hospital. These burdens led to material and organisational changes in the hospital, which  
32  
33 impacted how healthcare was done in these environments.  
34  
35  
36  
37  
38  
39

40 The introduction of COVID-19 cases into hospitals presented a need for higher  
41  
42 capacity emergency departments and intensive care units to keep up with the demand, as  
43  
44 well as additional isolation facilities to prevent further infection within the hospital.[36, 37]  
45  
46 Hospitals and healthcare delivery environments implemented and strengthened triage  
47  
48 systems to establish “hot zones,” which separated patients with confirmed or suspected  
49  
50 COVID-19 from other patients.[36, 38-40] This required the adaptation of existing spaces  
51  
52 and infrastructure, and changes to hospital staffing to support this zoning, leading to further  
53  
54 recruitment and redeployment of healthcare workers.[36, 41] Redeployed healthcare  
55  
56 workers reported low support, inadequate specialised knowledge and training for COVID-19  
57  
58  
59  
60

1  
2  
3 care, a lack of familiarity with patient treatments, poor communication, and feelings of  
4  
5 uncertainty, which impacted the quality of patient care delivery[38, 42-44]: *“They gave us 2*  
6  
7 *1/2 hours overview lecture on [Intensive Therapy Unit] setting then that is that, working in*  
8  
9 *an environment that you don’t know [...] Asked to give medications which you’re not*  
10  
11 *competent to do so.”*[44]  
12  
13

14  
15 Studies also evaluated the materiality of healthcare environments in relation to staff  
16  
17 comfort and safety. Existing spaces for staff in the hospital, including changing and  
18  
19 showering facilities and break rooms, often did not meet the increased need to physically  
20  
21 distance, decontaminate, and relax, and in some cases further spaces were found or  
22  
23 built.[43, 45, 46] The materiality of COVID-19 care spaces within the hospital also enhanced  
24  
25 the sense of risk in these environments: *“You were continuously exposed, closed spaces fully*  
26  
27 *covered with patients with COVID-19, where invasive techniques were conducted, there were*  
28  
29 *aerosols, vomits.”*[41] This sense of risk extended to homes as well, which became sites of  
30  
31 potential contagion that put those cohabiting with healthcare workers at risk.[46] One study  
32  
33 described healthcare workers managing this risk by creating “hot and cold zones” within  
34  
35 their homes, or even residing in hotels, thus isolating themselves from families and loved  
36  
37 ones.[47]  
38  
39  
40  
41  
42  
43  
44

45 In addition to the materiality and spatial layout of healthcare environments,  
46  
47 operations were also adapted to suit the evolving needs of hospitals, which further  
48  
49 impacted the ways in which bodies travelled and interacted with each other. Some services  
50  
51 and modes of care were prioritised as essential, leading non-essential services to be  
52  
53 conducted remotely (see “Virtual Care Spaces”).[48] The changes to hospital zoning  
54  
55 highlighted the need for adequate staff to ensure healthcare workers were not moving  
56  
57 between zones, thus impacting infection control measures.[36] Spatial limitations in the  
58  
59  
60

1  
2  
3 hospital further impacted communication between healthcare workers. Material barriers  
4  
5 within the hospital built environment required the implementation of different technologies  
6  
7 and procedural changes, such as the use of baby monitors or whiteboards, in order for  
8  
9 healthcare workers to communicate with each other and with patients.[46, 49] These  
10  
11 spatial barriers to face-to-face communication impacted the quality of care as  
12  
13 communication and emotional connection were compromised: *“Typically, when a trauma*  
14  
15 *patient comes in we're in the room first thing and we're sort of hearing the story. [...] And*  
16  
17 *now we're not in the room because of PPE. [...] we're getting a lot of information from these*  
18  
19 *very sick patients secondhand.”*[49]  
20  
21  
22  
23  
24

25 While the transformations outlined above largely point to adaptative changes  
26  
27 implemented in response to evolving healthcare needs, hospital environments also  
28  
29 underwent atmospheric transformations that produced affective engagements with the  
30  
31 care space. Participants in the literature employed the metaphor of the healthcare worker  
32  
33 as a “soldier” fighting a war and described the hospital environment as a “war zone” or  
34  
35 “battlefield”[41, 45, 50-54]: *“It was like that scene on ET, all that plastic.... So, there's all this*  
36  
37 *plastic and, I get it, but just walking into this other world, there was just mayhem,*  
38  
39 *pandemonium. People running around, alarms going off.... it was like a war zone.”*[45] Care  
40  
41 practices were also understood as generating affects that could resonate through the care  
42  
43 environment. One study highlighted a (variably defined) distinction between triaging care  
44  
45 and “rationing,” where the latter was described as a “taboo.”[39] This led in some cases to  
46  
47 care being provided beyond what was considered normal or beneficial clinical practice:  
48  
49 *“because of the sensitivity, the concern that people are going to be withholding care and this*  
50  
51 *institution doesn't want to be seen like that.”*[39]  
52  
53  
54  
55  
56  
57  
58  
59  
60

1  
2  
3 Events of high emotion and trauma haunted spaces in the hospital environment:

4  
5  
6 *“Even now, when I am on duty, when I enter some room(s), I see patients who could not*  
7  
8 *breathe, in bed, who died suddenly. I still have these flashes that still shock me, especially*  
9  
10 *when I enter two rooms in particular.”*[55] One study connected these local affects in the  
11  
12 hospital space to global atmospheres that are generated in the pandemic and travel through  
13  
14 media networks: *“I just had this moment of those pictures that you see from the New York*  
15  
16 *Times or whatever, of hospitals in America flashing up in your brain and going, ‘This is not*  
17  
18 *dissimilar. Are we going where they’re going?’”*[54] As with the other transformations  
19  
20 highlighted in this section, these atmospheric transformations were produced in and  
21  
22 through the materiality of sites of COVID-19 care and spatiotemporally reticulated the  
23  
24 healthcare environment.  
25  
26  
27  
28

## 29 30 **Theme 2: Virtual Care Spaces**

31  
32 The use of virtual spaces in healthcare has significantly expanded during the COVID-19  
33  
34 pandemic. As physical touch and interaction between bodies became understood as “risky,”  
35  
36 contact between bodies was mediated in healthcare environments via technologies  
37  
38 enabling remote care, including telephones, tablets, and online services.[54, 56] In addition  
39  
40 to reducing the risk of SARS-CoV-2 transmission, remote consultation services were  
41  
42 identified as having the capacity to increase healthcare access by reducing barriers relating  
43  
44 to travel, geographical location, time, disability, and resources[57, 58]: *“Patients could make*  
45  
46 *appointments and communicate with GPs online, then they were offered guidance on health*  
47  
48 *care and psychological support, and purchased drugs online under the instructions of*  
49  
50 *doctors, which may be a new way of work for GPs.”*[59] However, the digital divide was  
51  
52 identified as an issue affecting both healthcare workers and patients, as digital literacy and  
53  
54 internet access varied from person to person and region to region.[57, 60] Already-  
55  
56  
57  
58  
59  
60

1  
2  
3 vulnerable patients could thus be made more vulnerable: *“When reopening begins, those*  
4 *who have suffered as a result of these disparities will return to our care sicker and with*  
5 *deeper social needs.”* [60]  
6  
7  
8  
9

10           Quality of care in virtual care environments was a common concern in the literature.  
11  
12 Studies highlighted the practical implications of healthcare workers not being in the same  
13 room as patients, which could lead them to miss symptoms or changes in patients, misread  
14 body language or non-verbal communication, or experience increased language and  
15 intercultural communication barriers [57, 61]: *“Patients keep requesting for physical*  
16 *examination. [...] How will I prescribe without being sure...”* [57] One study also highlighted a  
17  
18  
19  
20  
21  
22  
23  
24  
25  
26  
27  
28  
29  
30  
31  
32  
33  
34  
35  
36  
37  
38  
39  
40  
41  
42  
43  
44  
45  
46  
47  
48  
49  
50  
51  
52  
53  
54  
55  
56  
57  
58  
59  
60  
“ripple’ effect” from the lack of physical assessment, where patients requiring general  
treatment were referred to emergency, thus increasing the burden placed on the  
emergency department. [36] In these ways, the virtual environment not only enacted  
changes in the individual care encounter between patient and healthcare worker, but also  
produced extended effects in the care journey and other care practices and experiences in  
the healthcare environment.

Remote care systems presented practical challenges when it came to monitoring and  
administering medication. [57, 62] The lack of face-to-face interactions (between both  
patients and doctors, and patients and their families) also produced barriers to emotional  
and social care [56, 61, 63]: *“the most important part of caring is PRESENCE. Touch, intimate*  
*conversation, allowing the patient to sit close, face-to-face interaction.”* [56] This was  
signalled as being particularly problematic in the context of COVID-19 given the heightened  
need for this kind of support; for example, one study emphasised the need for some  
patients with mental health issues to experience simple moments of physical contact: *“I*  
*think that some people just need the power of touch or a hug or a face-to-face human*

1  
2  
3 *person to ensure that they're kept safe and okay.*"[61] Telehealth was framed as a  
4  
5 compromised form of care that traded (but would "never be able to replace") "physical  
6  
7 touch and presence" for safety.[56]  
8  
9

10           Yet one study also identified a potential for increased emotional support through  
11  
12 remote care for patients who were already in isolation.[58] Participants identified  
13  
14 technologies of remote care as enabling new forms of interpersonal connection, fostering  
15  
16 modes of care that emphasised thoughtful verbal communication as an intentional practice  
17  
18 of care: *"The rediscovered importance of words, of a telephone conversation that becomes*  
19  
20 *an essential connection, and which is able to concentrate all the possible humanity,*  
21  
22 *closeness and help.*"[58] The study also reconceptualised virtual care as taking place not  
23  
24 "remotely," but rather "in the home," allowing a new and different form of intimacy to that  
25  
26 produced through face-to-face care in the hospital setting: *"Every day I called them, I*  
27  
28 *entered their homes, I saw their eyes, I evaluated their breathing. [...] I have been living with*  
29  
30 *them for these 20 days.*"[58]  
31  
32  
33  
34  
35  
36

37           While remote care had the capacity to enable healthcare workers to 'enter the  
38  
39 homes' of patients, so too did it bring the healthcare environment into the homes of  
40  
41 participants who worked remotely. Some studies found working from home gave  
42  
43 participants greater flexibility in work, limited workplace distractions, and reduced fears of  
44  
45 becoming infected or sick.[38, 43] However, for others, working from home presented  
46  
47 several challenges including technological issues (e.g. internet speed), distractions from  
48  
49 other occupants in the house, and insufficient or inappropriate physical space.[43, 60]  
50  
51  
52  
53

54           Many healthcare workers reported difficulties in establishing boundaries between  
55  
56 professional and personal space, especially when the broader pandemic context introduced  
57  
58 additional home responsibilities (e.g. homeschooling).[43, 48, 56, 60, 64] Working from  
59  
60

1  
2  
3 home brought colleagues and patients (virtually) into the personal spaces of healthcare  
4  
5 workers in ways that challenged comfort and privacy[56, 64]: *“Something I found hard was*  
6  
7 *the room I work in is also my bedroom. It can be a lot to have these difficult conversations in*  
8  
9 *your own room where your bed is, not having that space.”*[64] There were other practical  
10  
11 implications to this decrease in privacy as well; for example, one study noted the difficulty  
12  
13 of conducting confidential conversations when working in a shared living space.[48]  
14  
15  
16

17  
18 The erosion of boundaries between work and home also dissolved temporal markers  
19  
20 of ‘worktime.’ As homes became workplaces, other aspects of homelife (such as childcare)  
21  
22 became folded into the workday, thus disrupting work and family routines.[56, 60] More  
23  
24 rigid scheduling in virtual environments limited opportunities for informal discussions and  
25  
26 debriefs, and the absence of a daily commute (which previously operated as a temporal  
27  
28 boundary of worktime) caused the workday to stretch beyond regular hours.[48, 60] Such  
29  
30 spillage of worktime created a sense of pressure to always be available and “at work”[48,  
31  
32 60]: *“Working from home means that I am never ‘not working.’”*[60] These challenges  
33  
34 produced an increase in burnout, guilt, uncertainty in decision-making, and feelings of being  
35  
36 underappreciated.[38, 43, 48, 60, 61]  
37  
38  
39  
40  
41

42  
43 Virtual care spaces were also produced through the engagement of healthcare  
44  
45 workers with social media platforms. Studies described social media use as a practice of  
46  
47 knowledge sharing, enabling healthcare workers to access rapidly emerging information  
48  
49 about the pandemic through informal networks and put this emergent information into  
50  
51 practice.[52, 54, 65] These networks were identified as constituting experiential evidence  
52  
53 that could be disseminated and accessed more rapidly than traditional evidence through  
54  
55 official channels: *“our colleagues who are in the hot areas [...] send out some of their*  
56  
57 *experiences, how they are managing it, on Facebook or WhatsApp. So, we are just reading to*  
58  
59  
60

1  
2  
3 *see if we can incorporate their experience and then go from there.*"[65] However, these  
4  
5 modes of knowledge sharing were also conceptualised as risky, with the potential to amplify  
6  
7 misinformation and produce uncertainty through conflicting accounts of successful COVID-  
8  
9 19 care practices.[52, 54] Accessing information through social media also led some  
10  
11 participants to feel overwhelmed and anxious, particularly due to the circulation of news of  
12  
13 patient and healthcare worker deaths.[54, 59, 66]  
14  
15  
16

17  
18 Social media furthermore produced spaces of connection between healthcare  
19  
20 workers and the public. These spaces enabled the circulation of viral images (such as photos  
21  
22 of healthcare workers with sores from extended PPE use) and allowed healthcare workers  
23  
24 to disseminate information and share their personal experiences of working during the  
25  
26 pandemic.[66] They also created opportunities for both displays of gratitude and support  
27  
28 from the public and occasionally negative comments and abuse.[52, 65] These virtual spaces  
29  
30 of public engagement thus constituted potential sites of psychosocial support or anxiety for  
31  
32 healthcare workers.  
33  
34  
35

### 36 37 **Theme 3: Objects of Care**

38  
39 Material objects formed a central mechanism of COVID-19 care across the literature. The  
40  
41 most prominent object of care identified in the literature was PPE; studies described  
42  
43 shortages of PPE (particularly at the beginning of the pandemic) as a barrier to both the  
44  
45 safety of healthcare workers and their capacity to delivery care, with inadequate PPE  
46  
47 supplies causing anxiety and prompting participants to limit patient interactions and re-use  
48  
49 and/or share PPE [38, 42, 43, 45, 46, 49, 52, 58, 65, 67, 68]: *"I have the same N95 since*  
50  
51 *March. We also are only allowed one surgical mask for one week. We still are rationing*  
52  
53 *PPE."*[42] Several studies also identified inequities in PPE distribution, with lower-waged and  
54  
55 non-acute care roles being more likely to experience shortages.[38, 43, 46, 51, 62] Guidance  
56  
57  
58  
59  
60



1  
2  
3 around PPE use was often unclear, inconsistent, or changed from day to day, producing  
4  
5 anxiety in healthcare workers around the proper use of PPE.[36, 42-46, 67-69] Some studies  
6  
7 also noted problems related to the size and fit of PPE, especially for women and people with  
8  
9 facial hair (including people who do not shave for religious reasons).[46, 50, 66, 67]  
10  
11  
12

13         When PPE was available, its use presented a barrier to everyday practices of care.  
14  
15 Interactions with patients and their families were made more difficult as PPE obscured  
16  
17 faces, muffled voices, and obstructed body language, thus impacting communication and  
18  
19 emotional connection[36, 46, 48, 49, 51, 55, 70, 71]: *"I think arriving in full PPE, you're a bit*  
20  
21 *like an alien or a person from a nuclear reactor or something, and I think it's hard to build a*  
22  
23 *rapport with that."*[48] Communication with colleagues was also affected by PPE use,  
24  
25 especially between newer team members, impacting professional relationships and  
26  
27 increasing the risk of miscommunication in care practice.[36, 46, 49, 63, 71] Attempts to  
28  
29 bridge these emotional and communication gaps included individually decorating PPE or  
30  
31 attaching disposable photos of staff faces to gowns, which also had the practical benefit of  
32  
33 allowing patients and colleagues to differentiate between healthcare workers.[46, 63] The  
34  
35 literature also described PPE as limiting healthcare workers' senses (e.g. through the fogging  
36  
37 of glasses and face shields) and dexterity, producing challenges with some patient  
38  
39 procedures and increasing the risk of healthcare workers missing important health signs in  
40  
41 patients[40, 46, 48, 55, 62, 63, 67, 69]: *"I had to rely on the anatomical location to find the*  
42  
43 *femoral artery because I could not feel the pulsation when performing the arterial blood*  
44  
45 *taken for gas analysis."*[67] Healthcare workers additionally raised concerns about protocols  
46  
47 in emergency situations, where the time taken to don and doff PPE could leave patients  
48  
49 waiting longer for vital support.[46, 48, 69]  
50  
51  
52  
53  
54  
55  
56  
57  
58  
59  
60

1  
2  
3 The wearing of PPE took a significant physical and emotional toll on healthcare  
4  
5 workers. PPE was described as exhausting, uncomfortable, hot, difficult to breathe in, and  
6  
7 produced skin damage such as bruising and dermatitis[38, 40, 42, 43, 46, 61, 63, 65, 67-69,  
8  
9 71]: *“Wearing the whole set of PPEs is very uncomfortable. I have difficulty breathing and  
10  
11 feel very hot and my heart rate speeds up. We keep on sweating and the clothes are  
12  
13 soaked.”*[40] Adhering to infection control protocols (e.g. correctly donning and doffing PPE)  
14  
15 took a considerable amount of time and impacted how long healthcare workers could spend  
16  
17 with patients and their families.[36, 46, 68, 69] Healthcare workers adopted different  
18  
19 techniques to combat this issue. Some participants reported that shifts and processes were  
20  
21 reorganised so that care delivery could be clustered, allowing healthcare workers to visit  
22  
23 more patients in one go.[36, 68] However, studies also described healthcare workers  
24  
25 skipping breaks, not drinking water or using the toilet, and wearing adult diapers in an effort  
26  
27 to avoid donning and doffing (and possibly disposing of) PPE.[38, 43, 45, 46, 67, 68]

28  
29  
30 In addition to PPE shortages, the literature also revealed shortages of other essential  
31  
32 material objects of care (as well as the human resources necessary to use them), including  
33  
34 ventilators, dialysis machines, isolation and critical care beds, testing equipment, cleaning  
35  
36 supplies, and body bags.[38, 39, 42, 47, 51, 55, 57, 58] Triage became an important part of  
37  
38 the allocation of limited resources, however this required healthcare workers to make  
39  
40 ethical decisions about which patients were in most need of equipment such as ventilators  
41  
42 (which sometimes meant adapting guidelines on a case by case basis)[39, 53, 55, 57]: *“I had  
43  
44 to decide if the 88 year old grandma on dialysis gets the ventilator or the 44 year old [in full  
45  
46 code]. And even just the weight that you have to carry if that’s your decision right? That you  
47  
48 just condemned this person to die and not this person.”*[53]

1  
2  
3 Studies described changes to practice and other innovations that enabled healthcare  
4 workers to adapt to these resource challenges. Patients on ventilators who would normally  
5 receive one-on-one care had nurses working between them, and some patients were put on  
6 travel ventilators.[39] Staff at one hospital developed “grab bags” of equipment to help with  
7 clustered care and created a portable “resus trolley” so that patients did not need to be  
8 moved to a dedicated resuscitation area (which also helped limit virus transmission).[36]  
9  
10 One study even described a healthcare worker’s son using a 3D printer to make face shields  
11 and connections for a dialysis machine.[39] Across the literature, however, resource  
12 limitations were described as leading to compromised care: “Everybody gets a little bit of  
13 bad care.”[39]

14  
15 A significant concern in the literature related to uncertainties around appropriate  
16 treatment, frequent changes in protocols, and inconsistencies in treatment plans when it  
17 came to the acute care of patients with COVID-19[40, 42, 53, 55, 59, 63, 65, 71]: “The fact  
18 that a medication wasn’t proven. We didn’t have good data. [...] If you’re going to do  
19 something that’s unproven, you should do it within a trial. We could really be doing more  
20 harm than good.”[53] Studies described an absence of evidence-based treatment for  
21 COVID-19, though often did not make clear distinctions between pharmaceutical drugs and  
22 other clinical interventions when referring to treatment. Similarly, there was an implied but  
23 usually unarticulated distinction between “good data”[53] and informal knowledge sharing  
24 between healthcare professionals. Some studies noted that the lack of effective ‘treatment’  
25 options led to an increase in supportive care, which produced higher and unequally  
26 distributed workloads among healthcare workers, with nurses being disproportionately  
27 impacted by additional work (and the resultant risk of infection).[50, 70, 72]

1  
2  
3 Changes to care protocols transformed the bedside as a site of care. The types and  
4 frequency of care changed, with restrictions on visitors and in-person carers (including  
5 supportive care such as through social services) impacting the level of emotional support  
6 received via bedside care.[40, 49, 53, 62, 63, 69, 72, 73] These changes also had logistical  
7 impacts on care; for example, some hospitals implemented hybrid systems of care where  
8 nurses or trainee doctors would provide patient care in-person, with doctors and  
9 consultants using remote technologies to observe patients and support care without  
10 entering the ward.[48, 73] This required the healthcare workers providing in-person care to  
11 embody the authority and expertise of the doctor, while also observing the patient: "*The*  
12 *consultant was probably heavily relying on the nurses and the doctors there, rather than*  
13 *himself, to look at smaller behaviours ... little things like facial reactions, body language,*  
14 *things like that.*"<sup>29</sup>

15  
16 A notable motif throughout the literature was the affecting presence of pandemic  
17 death, which came to be known through the materiality of objects of care such as body bags  
18 and beds. Many healthcare workers had no experience handling dead bodies prior to the  
19 pandemic and this lack of knowledge, along with changes to processes for managing death  
20 in the hospital, meant that bodies were often not prepared in accordance with the religious  
21 or cultural beliefs of patients.[37, 51, 55, 71] Several studies described the affect generated  
22 through the object of the body bag or the physical preparation of dead bodies in accordance  
23 with infection control measures[40, 42, 55, 63]: "*When a patient with an infectious disease*  
24 *dies, the body is wrapped in several layers of cloth, packed into two bags, which are sprayed*  
25 *with disinfectant... It is a little hard to accept this form of death.*"[40] One study also  
26 described the emotional labour of a participant who spent multiple full shifts transporting  
27 bodies from hospital beds to the morgue.[38] However, an *absence* of bodies could also  
28  
29  
30  
31  
32  
33  
34  
35  
36  
37  
38  
39  
40  
41  
42  
43  
44  
45  
46  
47  
48  
49  
50  
51  
52  
53  
54  
55  
56  
57  
58  
59  
60

1  
2  
3 enact the presence of death in the hospital; one study described the experience of dealing  
4 with a shortage of beds one day and arriving at work the next day to see “*rows of empty*  
5 *beds.*”[38] Pandemic death thus distinctively emerged in the literature through its material  
6 relations with/in the COVID-19 context.  
7  
8  
9  
10  
11

## 12 **DISCUSSION**

13  
14  
15 This synthesis demonstrates how material objects, spaces, bodies, and affects entangle in  
16 care environments to facilitate the doing of healthcare. Because the materiality of the  
17 healthcare environment shapes care practices, transformations in the environment (both  
18 intentional and unanticipated) afford differing care experiences, which become ‘good,’  
19 ‘bad,’ ‘compromised’ or ‘good-enough’ care. This accentuates the importance of considering  
20 the material environment as critical to shaping the quality and delivery of care, especially in  
21 times of emergency and disruption. A systemic approach to care delivery not only sees  
22 adaptation as a means of working around the constraints of the material environment but  
23 demands a need for adaptable environments to enable ‘good care’ to be done. There is a  
24 tendency to focus on healthcare workers, and their attitudes and practices, as the locus and  
25 focus of change, rather than on the material environments which constrain or potentiate  
26 the care that healthcare workers provide. Our analysis, which has relevance for healthcare  
27 delivery beyond situations of emergency, pushes us towards a more systemic adaptation  
28 and change, from attitudes to materials, from individuals to environments.  
29  
30  
31  
32  
33  
34  
35  
36  
37  
38  
39  
40  
41  
42  
43  
44  
45  
46  
47  
48

### 49 **Materially Bounded Care Environments**

50  
51  
52 The studies examined in this qualitative synthesis were conducted within a range of  
53 healthcare delivery settings including hospitals, clinics, hospices, health centres, continuing  
54 care facilities, community or field settings, patient homes, and other out-of-hospital  
55 environments. Across these settings, healthcare was delivered within in-person, virtual, and  
56  
57  
58  
59  
60

1  
2  
3 hybrid environments. Though these healthcare delivery contexts were typically defined  
4 through architectural (e.g. the hospital building) and technological (e.g. telephone  
5 conferencing) mechanisms, such definitions inadequately encompass the spaces in which  
6 healthcare was done. Rather, we find that the boundaries of healthcare environments are  
7 neither solid nor fixed, as care extends in relations between and beyond these spaces.  
8  
9  
10  
11  
12  
13  
14

15 Virtual environments brought healthcare into virtual spaces, but also into the homes  
16 of patients and healthcare workers. Virtual care facilitated new and altered ways of  
17 travelling with and to patients and produced (sometimes unwanted) intimacies: the  
18 healthcare worker was able to 'enter the homes' of patients and develop a different kind of  
19 proximity to that which takes place in a hospital or clinic, but so too could patients and  
20 colleagues enter the homes of healthcare professionals working from home. The latter was  
21 conceptualised as an undesirable intimacy, which was not understood as facilitating 'better'  
22 care. Changes in the care encounter also resulted in new care paths and journeys in ways  
23 that were both enabling and produced capacities for harm. A virtual healthcare consult, for  
24 example, could improve healthcare access for some patients, but produced risks of  
25 overlooked symptoms and postponed healthcare procedures, thus resulting in delayed yet  
26 intensified healthcare needs.  
27  
28  
29  
30  
31  
32  
33  
34  
35  
36  
37  
38  
39  
40  
41  
42  
43  
44

45 While our analysis reveals the ways in which the spaces of healthcare have spilled  
46 out beyond healthcare settings, it also identifies more localised spaces and encounters as  
47 sites of care. Restrictions on visitors and healthcare practices drew attention to sites such as  
48 the bedside, which is normatively understood as a place where care happens. In this context  
49 the bedside is a site of *touch* and *presence*, both of which were conceptualised in the  
50 literature as modes of care practice that also facilitated certainty (e.g. physical examinations  
51 as a way of 'being sure' in care decisions). Negotiating the materiality of the healthcare  
52  
53  
54  
55  
56  
57  
58  
59  
60

1  
2  
3 environment thus became a crucial part of adapted care practice in the pandemic context.  
4  
5 Barriers to touch and presence, produced via alterations in zoning, PPE, care schedules, and  
6  
7 modes of communication, simultaneously enabled and constrained 'good' and 'safe' care.  
8  
9  
10 As touch between bodies became 'risky,' barriers to touch and presence, such as PPE and  
11  
12 zoning, enabled care to be done. However, these adaptations in the care environment  
13  
14 generated new risks, as they were also understood as producing 'compromised' care. Virtual  
15  
16 care environments, communication technologies (e.g. whiteboards, radios), hybrid  
17  
18 consultations, and other material innovations (e.g. decorated PPE) constituted proxies for  
19  
20 care, enabling a different proximity between healthcare worker and patient.  
21  
22  
23

### 24 25 **Extending Relations of Care**

26  
27 Our analysis shows that spatial and temporal constraints entangle with material practices in  
28  
29 healthcare systems, which produce 'rippling effects' beyond the individual care encounter.  
30  
31 For example, hospital infection control protocols led to changes in hospital zoning, which  
32  
33 revealed constraints in the resourcing of staff, PPE, and other equipment. Individual  
34  
35 adaptations in response to these constraints included healthcare workers reusing PPE,  
36  
37 skipping breaks, and spending less time with patients. In contrast, adaptations that  
38  
39 attended to the spatial or temporal features of the material environment allowed for  
40  
41 differing ways of doing care. Examples included creating schedules to facilitate care  
42  
43 clustering, developing hybrid consult systems, and implementing the use of objects such as  
44  
45 grab bags, trolleys, and radios. These adaptations allowed for altered ways of moving and  
46  
47 relating within the hospital, in turn producing new care spaces and care journeys.  
48  
49  
50  
51  
52  
53

54 Our mapping of the extending relations of the COVID-19 care environment allows us  
55  
56 to understand the ways through which local care practices—and how these are shaped by  
57  
58 the materiality of care environments—are themselves located in, and shaped by, broader  
59  
60

1  
2  
3 health systems and ecologies. We saw this, for instance, in how the rippling effects of virtual  
4 care encounters impacted upon hospital emergency departments, and how 'experiential  
5 evidence' from geographically distant COVID-19 'hot areas' was shared through informal  
6 virtual networks and tested in local care environments. Our analysis also points to the ways  
7 in which healthcare workers mediated their experiences and knowledge of COVID-19 care  
8 through engagement with a global pandemic imaginary. For example, a site of emotional  
9 trauma in a hospital might be enclosed by the four walls of a ward and tied to a single event,  
10 but this trauma became known through its relations with broader temporal and global  
11 pandemic uncertainties. The affects generated in and through the care environment  
12 facilitated other forms of knowing as well; (double) body bags, empty beds, social media  
13 posts, news media images, and practices of infection control in corpse management all  
14 enacted a knowing of pandemic death, distinct from other forms of death in healthcare  
15 work. These findings highlight how locally materialised affects and experiences of care  
16 connect with broader, as well as global, affects and adaptations generated by pandemic.

### 37 **Implications for Future Research and Practice**

38  
39 A pervasive orientation in the literature is emphasising what is absent, or deficient, in care  
40 environments. Our analysis, however, testifies to a responsiveness and ingenuity in how  
41 healthcare workers and services have adapted within constraining and disruptive care  
42 relations to make care environments work in the face of emergency. In turn, our findings  
43 emphasise a need for care environments themselves to be made more adaptable and  
44 malleable, such that these adaptive potentials can come together to enable 'good' care in  
45 times of uncertainty and change. The insights produced through this synthesis thus  
46 explicate how and why we might better attend to the material spaces, objects, practices,  
47 and affects through which healthcare environments are made (and made differently). This  
48  
49  
50  
51  
52  
53  
54  
55  
56  
57  
58  
59  
60



1  
2  
3 has practical implications for the building of resilient, responsive, and enabling care  
4  
5 environments. We highlight five implications:

- 6  
7  
8 • While the COVID-19 context calls attention to the consequences of insufficiently  
9  
10 flexible healthcare systems, the materiality of care environments is always in the  
11  
12 process of adapting what care is made possible. This gives us insights to build upon,  
13  
14 including for considering how good care is made possible, even in situations of risk  
15  
16 and constraint.
- 17  
18 • Interventions for optimising good and better care delivery need to move beyond a  
19  
20 focus on individual practices and better attend to the effects of the material  
21  
22 environment and how this enables or constrains care.
- 23  
24 • Interventions can capitalise on the fluid boundaries of care environments which  
25  
26 extend beyond local spaces and buildings to connect with more distant as well as  
27  
28 virtual care experiences.
- 29  
30 • Mapping how the material effects of healthcare 'ripple out' beyond individual  
31  
32 encounters and beyond particular healthcare environments is an important first step  
33  
34 to designing a more systemic and ecological approach to care.
- 35  
36 • Optimising the material care environment to deliver good care, especially in times of  
37  
38 emergency, requires learning from everyday adaptive practices in healthcare  
39  
40 experience, while making material environments more adaptable.

#### 41 42 43 44 45 46 47 48 49 **Strengths and Limitations**

50  
51  
52 The approach we have developed for critical interpretive synthesis (adapted from that  
53  
54 proposed by Dixon-Woods et al.[30]) has produced a versatile yet readily comprehensible  
55  
56 method for reviewing complex, diverse, and emerging data. We suggest that this method be  
57  
58 taken up in the development of future protocols for qualitative review. Given the critical  
59  
60

1  
2  
3 interpretive synthesis approach of our review, this paper is not intended as an exhaustive  
4  
5 account of the literature. The strengths of critical interpretive synthesis lie in its capacity to  
6  
7 undertake complex analyses of diverse qualitative data, develop insights that move beyond  
8  
9 the goals of the original studies, and generate theory that has applicability to both research  
10  
11 and practice. Our purposive sampling strategy facilitates these goals through a highly critical  
12  
13 and iterative approach to inclusion. It is possible that relevant literature could be missed  
14  
15 within this strategy, however our more flexible and inclusive approach to literature  
16  
17 searching in the earlier phases of sampling also make it more likely that papers have been  
18  
19 captured that would be missed in conventional systematic review methods. The resulting  
20  
21 sample may therefore reflect a broader and more diverse range of experiences.  
22  
23  
24  
25  
26

27  
28 There were also some logistical limitations in this synthesis. The global health  
29  
30 emergency context of the COVID-19 pandemic resulted in rapid publication of studies across  
31  
32 different temporal, geographical, and professional contexts in 2020 and 2021. Though the  
33  
34 prominent concerns addressed in this synthesis were found across health contexts, more  
35  
36 specific and contextual insights may have been missed. While many publishers have  
37  
38 expedited COVID-19-focused studies since the beginning of the pandemic, due to the timing  
39  
40 of our writing, the studies included in this synthesis were conducted within the first 18  
41  
42 months of the pandemic (with the majority of data collected in the first 6 months of 2020)  
43  
44 and employed methods that could be implemented rapidly, often at a distance, and without  
45  
46 producing unnecessary further burden on already-stressed healthcare systems. This  
47  
48 resulted in a lack of longitudinal and ethnographic methods (though some papers were  
49  
50 linked to larger studies that may include data from such methods). Additionally, we have  
51  
52 exclusively included studies published in English, as this is the only shared language  
53  
54 between the authors.  
55  
56  
57  
58  
59  
60

1  
2  
3 A final limitation of this synthesis relates to the complexity of defining COVID-19  
4 care. Much of the literature did not distinguish between findings related to COVID-19-  
5 specific and non-COVID-19 care, and terms such as 'treatment,' 'therapies,' and 'care' were  
6 employed inconsistently in the literature, often without definitions of what these words  
7 meant in practice. Many studies implicitly established distinctions between curative medical  
8 treatment and symptom management, with the latter framed as care done in the absence  
9 of, or while waiting for, 'effective' treatment options. Such a framing presents several  
10 issues. First, it delimits the efficacy of supportive care *as care*, and obscures relations  
11 between symptom monitoring or management and health outcomes. Second, it sits at odds  
12 with descriptions of informal knowledge sharing networks, which themselves enact an  
13 efficacy in their shared care practices, however limited, incomplete, or uncertain. Put  
14 another way, framing symptom management practices against *lacking* or *unknown* care  
15 practices de-emphasises what care *is already being done* in these contexts. Finally,  
16 reinforcing distinctions between types of care may not make sense in the provision of care,  
17 but instead reveal an artificial separation in clinical practice.

## 39 CONCLUSIONS

40  
41 This paper is the first to synthesise qualitative research investigating healthcare workers'  
42 experiences during the COVID-19 pandemic with an aim to explicate how the materiality of  
43 the healthcare environment shapes care delivery. The findings of this paper demonstrate  
44 how the healthcare environment can enable and constrain 'good' care, and how changes in  
45 this environment produce complex and rippling health effects. The insights generated  
46 through this synthesis are valuable in supporting healthcare workers, managers, and  
47 organisations in developing up enabling care environments and adapting care practices  
48 through an attention to the materiality of the environment itself.

## ACKNOWLEDGEMENTS

The Centre for Social Research in Health at the University of New South Wales (UNSW) is supported by a grant from the Australian Government Department of Health. We are grateful for support from the UNSW Scientia (Associate Professor Kari Lancaster) and SHARP (Professor Tim Rhodes) schemes.

## AUTHOR CONTRIBUTIONS

MH was responsible for the conception and design of the review, data collection, and analysis. TR and KL contributed to research design and provided feedback on data analysis. MH drafted the manuscript. All authors critically revised the manuscript and approved the final version.

## FUNDING

This research received no specific grant from any funding agency in the public, commercial or not-for-profit sectors.

## COMPETING INTERESTS

None declared.

## DATA AVAILABILITY STATEMENT

Not applicable.

## ETHICS APPROVAL

Not required—review.

## REFERENCES

1. Vindrola-Padros C, Andrews L, Dowrick A, et al. Perceptions and experiences of healthcare workers during the COVID-19 pandemic in the UK. *BMJ Open* 2020;10(11):e040503. doi: 10.1136/bmjopen-2020-040503
2. Jayasekara JHPRU, Siriwardana CSA, Amaratunga D, et al. Redesigning and Repurposing Healthcare Facilities for the New Normal, COVID-19: A Review on New Approaches in Hospital Systems. In: Dissanayake R, Mendis P, Weerasekera K, et al., eds. *Lecture Notes in Civil Engineering*. Singapore: Springer 2022:211-34.
3. Barach P, Fisher SD, Adams MJ, et al. Disruption of healthcare: Will the COVID pandemic worsen non-COVID outcomes and disease outbreaks? *Prog Pediatr Cardiol* 2020;59:101254. doi: 10.1016/j.ppedcard.2020.101254
4. Langran C, Mantzourani E, Hughes L, et al. "I'm at breaking point"; Exploring pharmacists' resilience, coping and burnout during the COVID-19 pandemic. *Explor Res Clin Soc Pharm* 2022;5:100104. doi: 10.1016/j.rcsop.2022.100104
5. Sheraton M, Deo N, Dutt T, et al. Psychological effects of the COVID 19 pandemic on healthcare workers globally: A systematic review. *Psychiatry Res* 2020;292:113360. doi: 10.1016/j.psychres.2020.113360
6. Koontalay A, Suksatan W, Prabsangob K, et al. Healthcare Workers' Burdens During the COVID-19 Pandemic: A Qualitative Systematic Review. *J Multidiscip Healthc* 2021;14:3015-25. doi: 10.2147/jmdh.S330041
7. Joo JY, Liu MF. Nurses' barriers to caring for patients with COVID-19: a qualitative systematic review. *Int Nurs Rev* 2021;68(2):202-13. doi: 10.1111/inr.12648
8. Whear R, Abbott RA, Bethel A, et al. Impact of COVID-19 and other infectious conditions requiring isolation on the provision of and adaptations to fundamental nursing care in hospital in terms of overall patient experience, care quality, functional ability, and treatment outcomes: systematic review. *J Adv Nurs* 2022;78(1):78-108. doi: 10.1111/jan.15047
9. Danesh MK, Garosi E, Golmohamadpour H. The COVID-19 Pandemic and nursing challenges: A review of the early literature. *Work* 2021;69(1):23-36. doi: 10.3233/wor-213458
10. Turner S, Botero-Tovar N, Herrera MA, et al. Systematic review of experiences and perceptions of key actors and organisations at multiple levels within health systems internationally in responding to COVID-19. *Implement Sci* 2021;16(1):50. doi: 10.1186/s13012-021-01114-2
11. Xu H, Stjernswärd S, Glasdam S. Psychosocial experiences of frontline nurses working in hospital-based settings during the COVID-19 pandemic - A qualitative systematic review. *Int J Nurs Stud Adv* 2021;3:100037. doi: 10.1016/j.ijnsa.2021.100037
12. Aydogdu ALF. Ethical dilemmas experienced by nurses while caring for patients during the Covid-19 pandemic: An integrative review of qualitative studies. *J Nurs Manag* 2022 doi: 10.1111/jonm.13585 [published Online First: 10 March 2022]
13. Billings J, Ching BCF, Gkofa V, et al. Experiences of frontline healthcare workers and their views about support during COVID-19 and previous pandemics: a systematic review and qualitative meta-synthesis. *BMC Health Serv Res* 2021;21(1):923. doi: 10.1186/s12913-021-06917-z

14. Glasdam S, Sandberg H, Stjernswärd S, et al. Nurses' use of social media during the COVID-19 pandemic—A scoping review. *PLoS One* 2022;17(2):e0263502. doi: 10.1371/journal.pone.0263502
15. Huerta-González S, Selva-Medrano D, López-Espuela F, et al. The Psychological Impact of COVID-19 on Front Line Nurses: A Synthesis of Qualitative Evidence. *Int J Environ Res Public Health* 2021;18(24):12975.
16. Riedel P-L, Kreh A, Kulcar V, et al. A Scoping Review of Moral Stressors, Moral Distress and Moral Injury in Healthcare Workers during COVID-19. *Int J Environ Res Public Health* 2022;19(3):1666.
17. Troglia da Silva FC, Neto MLR. Psychiatric disorders in health professionals during the COVID-19 pandemic: A systematic review with meta-analysis. *J Psychiatr Res* 2021;140:474-87. doi: 10.1016/j.jpsychires.2021.03.044
18. Vera San Juan N, Clark SE, Camilleri M, et al. Training and redeployment of healthcare workers to intensive care units (ICUs) during the COVID-19 pandemic: a systematic review. *BMJ Open* 2022;12(1):e050038. doi: 10.1136/bmjopen-2021-050038
19. Sigahi TFAC, Kawasaki BC, Bolis I, et al. A systematic review on the impacts of Covid-19 on work: Contributions and a path forward from the perspectives of ergonomics and psychodynamics of work. *Hum Factors Ergon Manuf* 2021:1-14. doi: 10.1002/hfm.20889 [published Online First: 21 June 2021]
20. Buse C, Martin D, Nettleton S. Conceptualising 'materialities of care': making visible mundane material culture in health and social care contexts. *Sociol Health Illn* 2018;40(2):243-55. doi: 10.1111/1467-9566.12663
21. Latimer J. Afterword: materialities, care, 'ordinary affects', power and politics. *Sociol Health Illn* 2018;40(2):379-91. doi: 10.1111/1467-9566.12678
22. Puig de la Bellacasa M. Matters of care: Speculative ethics in more than human worlds. Minneapolis (MN): U of Minnesota Press 2017.
23. Broom A, Doron A. Resistant bugs, porous borders and ecologies of care in India. *Soc Sci Med* 2022;292:114520. doi: 10.1016/j.socscimed.2021.114520
24. Fox NJ, Alldred P. Sociology and the new materialism: Theory, research, action. London (GB): SAGE Publications 2016.
25. Martin D, Nettleton S, Buse C, et al. Architecture and health care: a place for sociology. *Sociol Health Illn* 2015;37(7):1007-22. doi: 10.1111/1467-9566.12284
26. Brown N, Buse C, Lewis A, et al. Air care: an 'aerography' of breath, buildings and bugs in the cystic fibrosis clinic. *Sociol Health Illn* 2020;42(5):972-86. doi: 10.1111/1467-9566.13104
27. Pink S, Duque M, Sumartojo S, et al. Making Spaces for Staff Breaks: A Design Anthropology Approach. *HERD* 2020;13(2):243-55. doi: 10.1177/1937586719900954
28. Duff C. Exploring the role of 'enabling places' in promoting recovery from mental illness: A qualitative test of a relational model. *Health Place* 2012;18(6):1388-95. doi: 10.1016/j.healthplace.2012.07.003
29. Fox NJ, Powell K. Non-human matter, health disparities and a thousand tiny dis/advantages. *Sociol Health Illn* 2021;43(3):779-95. doi: 10.1111/1467-9566.13265
30. Dixon-Woods M, Cavers D, Agarwal S, et al. Conducting a critical interpretive synthesis of the literature on access to healthcare by vulnerable groups. *BMC Med Res Methodol* 2006;6(1):35. doi: 10.1186/1471-2288-6-35

- 1
- 2
- 3
- 4 31. Booth A. Harnessing Energies, Resolving Tensions: Acknowledging a Dual Heritage for
- 5 Qualitative Evidence Synthesis. *Qual Health Res* 2019;29(1):18-31. doi:
- 6 10.1177/1049732318808247
- 7 32. Booth A, Carroll C, Ilott I, et al. Desperately Seeking Dissonance: Identifying the
- 8 Disconfirming Case in Qualitative Evidence Synthesis. *Qual Health Res*
- 9 2013;23(1):126-41. doi: 10.1177/1049732312466295
- 10 33. Barnett-Page E, Thomas J. Methods for the synthesis of qualitative research: a critical
- 11 review. *BMC Med Res Methodol* 2009;9(1):59. doi: 10.1186/1471-2288-9-59
- 12 34. Greenhalgh T, Peacock R. Effectiveness and efficiency of search methods in systematic
- 13 reviews of complex evidence: audit of primary sources. *BMJ* 2005;331(7524):1064-
- 14 65. doi: 10.1136/bmj.38636.593461.68
- 15 35. Thomas J, Harden A. Methods for the thematic synthesis of qualitative research in
- 16 systematic reviews. *BMC Med Res Methodol* 2008;8(1):45. doi: 10.1186/1471-2288-
- 17 8-45
- 18 36. Conlon C, McDonnell T, Barrett M, et al. The impact of the COVID-19 pandemic on child
- 19 health and the provision of Care in Paediatric Emergency Departments: a qualitative
- 20 study of frontline emergency care staff. *BMC Health Serv Res* 2021;21(1):279. doi:
- 21 10.1186/s12913-021-06284-9
- 22 37. Al Ghafri T, Al Ajmi F, Anwar H, et al. The Experiences and Perceptions of Health-Care
- 23 Workers During the COVID-19 Pandemic in Muscat, Oman: A Qualitative Study. *J*
- 24 *Prim Care Community Health* 2020;11 doi: 10.1177/2150132720967514
- 25 38. Blake H, Gupta A, Javed M, et al. COVID-Well Study: Qualitative Evaluation of Supported
- 26 Wellbeing Centres and Psychological First Aid for Healthcare Workers during the
- 27 COVID-19 Pandemic. *Int J Environ Res Public Health* 2021;18(7):3626. doi:
- 28 10.3390/ijerph18073626
- 29 39. Butler CR, Wong SPY, Wightman AG, et al. US Clinicians' Experiences and Perspectives on
- 30 Resource Limitation and Patient Care During the COVID-19 Pandemic. *JAMA Netw*
- 31 *Open* 2020;3(11):e2027315. doi: 10.1001/jamanetworkopen.2020.27315
- 32 40. Liu Q, Luo D, Haase JE, et al. The experiences of health-care providers during the COVID-
- 33 19 crisis in China: a qualitative study. *Lancet Glob Health* 2020;8(6):e790-e98. doi:
- 34 10.1016/S2214-109X(20)30204-7
- 35 41. Palacios-Ceña D, Fernández-de-las-Peñas C, Palacios-Ceña M, et al. Working on the
- 36 Frontlines of the COVID-19 Pandemic: A Qualitative Study of Physical Therapists'
- 37 Experience in Spain. *Phys Ther* 2021;101(4):1-9. doi: 10.1093/ptj/pzab025
- 38 42. Arnetz JE, Goetz CM, Arnetz BB, et al. Nurse reports of stressful situations during the
- 39 COVID-19 pandemic: qualitative analysis of survey responses. *Int J Environ Res Public*
- 40 *Health* 2020;17(21):8126. doi: 10.3390/ijerph17218126
- 41 43. Digby R, Winton-Brown T, Finlayson F, et al. Hospital staff well-being during the first
- 42 wave of COVID-19: Staff perspectives. *Int J Ment Health Nurs* 2021;30(2):440-50. doi:
- 43 10.1111/inm.12804
- 44 44. Newman KL, Jevé Y, Majumder P. Experiences and emotional strain of NHS frontline
- 45 workers during the peak of the COVID19 pandemic. *Int J Soc Psychiatry* 2021:1-8.
- 46 doi: 10.1177/00207640211006153 [published Online First: 13 April 2021]
- 47 45. Baldwin S, George J. Qualitative study of UK health professionals' experiences of working
- 48 at the point of care during the COVID-19 pandemic. *BMJ Open* 2021;11(9):e054377.
- 49 doi: 10.1136/bmjopen-2021-054377
- 50
- 51
- 52
- 53
- 54
- 55
- 56
- 57
- 58
- 59
- 60



- 1
- 2
- 3
- 4 46. Hoernke K, Djellouli N, Andrews L, et al. Frontline healthcare workers' experiences with
- 5 personal protective equipment during the COVID-19 pandemic in the UK: a rapid
- 6 qualitative appraisal. *BMJ Open* 2021;11(1):e046199. doi: 10.1136/bmjopen-2020-
- 7 046199
- 8
- 9 47. Parsons Leigh J, Kemp LG, de Groot C, et al. A qualitative study of physician perceptions
- 10 and experiences of caring for critically ill patients in the context of resource strain
- 11 during the first wave of the COVID-19 pandemic. *BMC Health Serv Res*
- 12 2021;21(1):374. doi: 10.1186/s12913-021-06393-5
- 13
- 14 48. Liberati E, Richards N, Willars J, et al. A qualitative study of experiences of NHS mental
- 15 healthcare workers during the Covid-19 pandemic. *BMC Psychiatry* 2021;21(1):250.
- 16 doi: 10.1186/s12888-021-03261-8
- 17
- 18 49. Hayirli TC, Stark N, Bhanja A, et al. Masked and distanced: a qualitative study of how
- 19 personal protective equipment and distancing affect teamwork in emergency care.
- 20 *Int J Qual Health Care* 2021;33(2):1-6. doi: 10.1093/intqhc/mzab069
- 21
- 22 50. Saleem J, Ishaq M, Zakar R, et al. Experiences of frontline Pakistani emigrant physicians
- 23 combating COVID-19 in the United Kingdom: a qualitative phenomenological
- 24 analysis. *BMC Health Serv Res* 2021;21(1):291. doi: 10.1186/s12913-021-06308-4
- 25
- 26 51. Chandler-Jeanville S, Nohra RG, Loizeau V, et al. Perceptions and Experiences of the
- 27 COVID-19 Pandemic amongst Frontline Nurses and Their Relatives in France in Six
- 28 Paradoxes: A Qualitative Study. *Int J Environ Res Public Health* 2021;18(13):6977. doi:
- 29 10.3390/ijerph18136977
- 30
- 31 52. Deliktas Demirci A, Oruc M, Kabukcuoglu K. 'It was difficult, but our struggle to touch
- 32 lives gave us strength': The experience of nurses working on COVID-19 wards. *J Clin*
- 33 *Nurs* 2021;30(5-6):732-41. doi: 10.1111/jocn.15602
- 34
- 35 53. Rao H, Mancini D, Tong A, et al. Frontline interdisciplinary clinician perspectives on
- 36 caring for patients with COVID-19: a qualitative study. *BMJ Open*
- 37 2021;11(5):e048712. doi: 10.1136/bmjopen-2021-048712
- 38
- 39 54. Williams Veazey L, Broom A, Kenny K, et al. Entanglements of affect, space, and
- 40 evidence in pandemic healthcare: An analysis of Australian healthcare workers'
- 41 experiences of COVID-19. *Health Place* 2021;72:102693. doi:
- 42 10.1016/j.healthplace.2021.102693
- 43
- 44 55. Testoni I, Franco C, Gallo Stampino E, et al. Facing COVID-19 Between Sensory and
- 45 Psychoemotional Stress, and Instrumental Deprivation: A Qualitative Study of
- 46 Unmanageable Critical Incidents With Doctors and Nurses in Two Hospitals in
- 47 Northern Italy. *Front Psychol* 2021;12(622894):1-13. doi: 10.3389/fpsyg.2021.622894
- 48
- 49 56. Pastrana T, De Lima L, Pettus K, et al. The impact of COVID-19 on palliative care workers
- 50 across the world: A qualitative analysis of responses to open-ended questions.
- 51 *Palliat Support Care* 2021:1-6. doi: 10.1017/S1478951521000298 [published Online
- 52 First: 2 March 2021]
- 53
- 54 57. Banerjee D, Vajawat B, Varshney P, et al. Perceptions, Experiences, and Challenges of
- 55 Physicians Involved in Dementia Care During the COVID-19 Lockdown in India: A
- 56 Qualitative Study. *Front Psychiatry* 2020;11:615758. doi: 10.3389/fpsyg.2020.615758
- 57
- 58 58. Kurotschka PK, Serafini A, Demontis M, et al. General Practitioners' Experiences During
- 59 the First Phase of the COVID-19 Pandemic in Italy: A Critical Incident Technique
- 60 Study. *Front Public Health* 2021;9:623904. doi: 10.3389/fpubh.2021.623904
- 61
- 62 59. Yip YC, Yip KH, Tsui WK. The Transformational Experience of Junior Nurses Resulting
- 63 from Providing Care to COVID-19 Patients: From Facing Hurdles to Achieving



- 1  
2  
3 Psychological Growth. *Int J Environ Res Public Health* 2021;18(14):7383. doi:  
4 10.3390/ijerph18147383  
5  
6 60. Ross AM, Schneider S, Muneton-Castano YF, et al. "You never stop being a social  
7 worker." Experiences of pediatric hospital social workers during the acute phase of  
8 the COVID-19 pandemic. *Soc Work Health Care* 2021;60(1):8-29. doi:  
9 10.1080/00981389.2021.1885565  
10  
11 61. Aughterson H, McKinlay AR, Fancourt D, et al. Psychosocial impact on frontline health  
12 and social care professionals in the UK during the COVID-19 pandemic: a qualitative  
13 interview study. *BMJ Open* 2021;11(2):e047353. doi: 10.1136/bmjopen-2020-047353  
14  
15 62. Cheong MWL. "To be or not to be in the ward": The impact of COVID-19 on the role of  
16 hospital-based clinical pharmacists—A qualitative study. *J Am Coll Clin Pharm*  
17 2020;3:1458-63. doi: 10.1002/jac5.1315  
18  
19 63. Montgomery CM, Humphreys S, McCulloch C, et al. Critical care work during COVID-19: a  
20 qualitative study of staff experiences in the UK. *BMJ Open* 2021;11(5):e048124. doi:  
21 10.1136/bmjopen-2020-048124  
22  
23 64. Billings J, Biggs C, Ching BCF, et al. Experiences of mental health professionals supporting  
24 front-line health and social care workers during COVID-19: qualitative study. *BJPsych*  
25 *Open* 2021;7(2):e70. doi: 10.1192/bjo.2021.29  
26  
27 65. Norful AA, Rosenfeld A, Schroeder K, et al. Primary drivers and psychological  
28 manifestations of stress in frontline healthcare workforce during the initial COVID-19  
29 outbreak in the United States. *Gen Hosp Psychiatry* 2021;69:20-26. doi:  
30 10.1016/j.genhosppsych.2021.01.001  
31  
32 66. Rees N, Smythe L, Hogan C, et al. Paramedic experiences of providing care in wales (UK)  
33 during the 2020 COVID-19 pandemic (PECC-19): a qualitative study using evolved  
34 grounded theory. *BMJ Open* 2021;11(6):e048677. doi: 10.1136/bmjopen-2021-  
35 048677  
36  
37 67. Chen F, Zang Y, Liu Y, et al. Dispatched nurses' experience of wearing full gear personal  
38 protective equipment to care for COVID-19 patients in China-A descriptive  
39 qualitative study. *J Clin Nurs* 2021;30(13-14):2001-14. doi: 10.1111/jocn.15753  
40  
41 68. Crowe S, Howard AF, Vanderspank-Wright B, et al. The effect of COVID-19 pandemic on  
42 the mental health of Canadian critical care nurses providing patient care during the  
43 early phase pandemic: A mixed method study. *Intensive Crit Care Nurs*  
44 2021;63:102999. doi: 10.1016/j.iccn.2020.102999  
45  
46 69. Ness MM, Saylor J, Di Fusco LA, et al. Healthcare providers' challenges during the  
47 coronavirus disease (COVID-19) pandemic: A qualitative approach. *Nurs Health Sci*  
48 2021;23(2):389-97. doi: 10.1111/nhs.12820  
49  
50 70. Fernández-Castillo RJ, González-Caro MD, Fernández-García E, et al. Intensive care  
51 nurses' experiences during the COVID-19 pandemic: A qualitative study. *Nurs Crit*  
52 *Care* 2021:1-10. doi: 10.1111/nicc.12589 [published Online First: 6 January 2021]  
53  
54 71. Galehdar N, Kamran A, Toulabi T, et al. Exploring nurses' experiences of psychological  
55 distress during care of patients with COVID-19: a qualitative study. *BMC Psychiatry*  
56 2020;20(1):489. doi: 10.1186/s12888-020-02898-1  
57  
58 72. Sheng Q, Zhang X, Wang X, et al. The influence of experiences of involvement in the  
59 COVID-19 rescue task on the professional identity among Chinese nurses: A  
60 qualitative study. *J Nurs Manag* 2020;28(7):1662-69. doi: 10.1111/jonm.13122  
73. Jia Y, Chen O, Xiao Z, et al. Nurses' ethical challenges caring for people with COVID-19: A  
qualitative study. *Nurs Ethics* 2021;28(1):33-45. doi: 10.1177/0969733020944453

# BMJ Open

## How do care environments shape healthcare? A synthesis of qualitative studies among healthcare workers during the COVID-19 pandemic

|                                 |                                                                                                                                                                                                                                                                                                              |
|---------------------------------|--------------------------------------------------------------------------------------------------------------------------------------------------------------------------------------------------------------------------------------------------------------------------------------------------------------|
| Journal:                        | <i>BMJ Open</i>                                                                                                                                                                                                                                                                                              |
| Manuscript ID                   | bmjopen-2022-063867.R1                                                                                                                                                                                                                                                                                       |
| Article Type:                   | Original research                                                                                                                                                                                                                                                                                            |
| Date Submitted by the Author:   | 10-Aug-2022                                                                                                                                                                                                                                                                                                  |
| Complete List of Authors:       | Harrison, Mia; University of New South Wales, Centre for Social Research in Health<br>Rhodes, Tim; University of New South Wales, Centre for Social Research in Health; London School of Hygiene & Tropical Medicine<br>Lancaster, Kari; University of New South Wales, Centre for Social Research in Health |
| <b>Primary Subject Heading</b>: | Qualitative research                                                                                                                                                                                                                                                                                         |
| Secondary Subject Heading:      | Health services research, Research methods, Qualitative research, Sociology, Public health                                                                                                                                                                                                                   |
| Keywords:                       | COVID-19, Quality in health care < HEALTH SERVICES ADMINISTRATION & MANAGEMENT, QUALITATIVE RESEARCH, INTENSIVE & CRITICAL CARE                                                                                                                                                                              |
|                                 |                                                                                                                                                                                                                                                                                                              |

SCHOLARONE™  
Manuscripts



I, the Submitting Author has the right to grant and does grant on behalf of all authors of the Work (as defined in the below author licence), an exclusive licence and/or a non-exclusive licence for contributions from authors who are: i) UK Crown employees; ii) where BMJ has agreed a CC-BY licence shall apply, and/or iii) in accordance with the terms applicable for US Federal Government officers or employees acting as part of their official duties; on a worldwide, perpetual, irrevocable, royalty-free basis to BMJ Publishing Group Ltd ("BMJ") its licensees and where the relevant Journal is co-owned by BMJ to the co-owners of the Journal, to publish the Work in this journal and any other BMJ products and to exploit all rights, as set out in our [licence](#).

The Submitting Author accepts and understands that any supply made under these terms is made by BMJ to the Submitting Author unless you are acting as an employee on behalf of your employer or a postgraduate student of an affiliated institution which is paying any applicable article publishing charge ("APC") for Open Access articles. Where the Submitting Author wishes to make the Work available on an Open Access basis (and intends to pay the relevant APC), the terms of reuse of such Open Access shall be governed by a Creative Commons licence – details of these licences and which [Creative Commons](#) licence will apply to this Work are set out in our licence referred to above.

Other than as permitted in any relevant BMJ Author's Self Archiving Policies, I confirm this Work has not been accepted for publication elsewhere, is not being considered for publication elsewhere and does not duplicate material already published. I confirm all authors consent to publication of this Work and authorise the granting of this licence.

**TITLE**

How do care environments shape healthcare? A synthesis of qualitative studies among healthcare workers during the COVID-19 pandemic

**CORRESPONDING AUTHOR**

Mia Harrison

Centre for Social Research in Health, University of New South Wales, High St, Kensington, NSW 2052, Australia.

[mia.harrison@unsw.edu.au](mailto:mia.harrison@unsw.edu.au)

**AUTHOR 1**

Mia Harrison

- 1) Centre for Social Research in Health, University of New South Wales, Sydney, Australia

**AUTHOR 2**

Tim Rhodes

- 1) Centre for Social Research in Health, University of New South Wales, Sydney, Australia
- 2) London School of Hygiene & Tropical Medicine, London, United Kingdom

**AUTHOR 3**

Kari Lancaster

- 1) Centre for Social Research in Health, University of New South Wales, Sydney, Australia

**WORD COUNT**

7743

## ABSTRACT

**Objective:** To investigate how care is shaped through the material practices and spaces of healthcare environments during the COVID-19 pandemic.

**Design:** Critical interpretive synthesis of qualitative research.

**Participants:** Studies included qualitative research investigating the experiences of healthcare workers involved in the care of individuals during the COVID-19 pandemic.

**Results:** 134 articles were identified in the initial sampling frame with 38 studies involving 2507 participants included in the final synthesis. Three themes were identified in the analysis: 1) the hospital transformed; 2) virtual care spaces; and 3) objects of care. Through the generation of these themes, a synthesising argument was developed to demonstrate how material spaces and practices of healthcare shape care delivery and to provide insights to support healthcare providers in creating enabling and resilient care environments.

**Conclusions:** The findings of this study demonstrate how healthcare environments enable and constrain modes of care. Practices of care are shaped through the materiality of spaces and objects, including how these change in the face of pandemic disruption. The implication is that the healthcare environment needs to be viewed as a critical adaptive element in the optimisation of care. The study also develops a versatile and coherent approach to critical interpretive synthesis methods that can be taken up in future research.

**Keywords:** COVID-19, quality in health care, qualitative research, intensive & critical care

## ARTICLE SUMMARY

### Strengths and Limitations of This Study

- This study employed a critical interpretive synthesis method for review of literature, which enabled the development of new insights about how the materiality of

1  
2  
3 healthcare environments shaped practices of care during the COVID-19 pandemic,  
4  
5 thus extending the goals of the included studies.  
6  
7

- 8 • This study utilised a flexible and iterative purposive sampling strategy, which  
9  
10 prioritised diversity and richness of qualitative data over exhaustive representation.  
11  
12
- 13 • This study is oriented towards practice and presents a starting point for the  
14  
15 development of further theoretical work.  
16  
17
- 18 • Included studies were primarily limited to the earlier stages of the COVID-19  
19  
20 pandemic and inconsistently defined COVID-19 care and treatment.  
21  
22
- 23 • Included studies were limited to interview, focus group, and survey methods.  
24

## 25 **INTRODUCTION**

26  
27 This paper investigates how the materiality of the healthcare environment shapes care  
28  
29 experiences, and how care practices and spaces transform in uncertain health contexts.  
30  
31

32  
33 Taking the COVID-19 pandemic as our case, this review synthesises qualitative studies  
34  
35 investigating the experiences of healthcare workers involved in the care of patients during  
36  
37 the COVID-19 pandemic. While these studies attend to COVID-19 in an 'emergency' framing,  
38  
39 they call attention to enduring concerns that will affect healthcare practices and spaces in  
40  
41 the years to come. The COVID-19 context presents an opportunity to identify the ways  
42  
43 through which the materiality of the care environment enables and constrains ways of  
44  
45 doing healthcare with particular attention to care as an emergent and adaptive feature of  
46  
47 its environment and situation.[1-4] This work is important, not only for considering how  
48  
49 care is adapted in fast-moving situations of disruption such as emergency, but also for how  
50  
51 adaptive responses to care can endure as part of a systemic response.[2]  
52  
53  
54  
55

56  
57 Existing reviews into the experiences of healthcare workers during the COVID-19  
58  
59 pandemic have primarily focused on the mental health impacts of COVID-19 on healthcare  
60

1  
2  
3 workers (and interventions and strategies for coping), and other barriers to and adaptations  
4  
5 for care including those related to resource allocation, access to relevant information and  
6  
7 training, the impacts of wearing personal protective equipment (PPE), stigma, and logistical  
8  
9 challenges, particularly around infection control and prevention.[5-18] Another review  
10  
11 examined the impacts of environments on workers in the COVID-19 context more broadly,  
12  
13 including the environments of healthcare workers.[19] To investigate this further, we trace  
14  
15 how aspects of the healthcare environment (that is, the sites, spaces, and conditions  
16  
17 through which care is delivered and/or received) shape the healthcare experience,  
18  
19 particularly in uncertain or rapidly changing health contexts. We consider ways of  
20  
21 identifying how healthcare workers can be better supported not only *in* but *through* their  
22  
23 environments. We finally explore how healthcare services might develop efforts to create  
24  
25 enabling and resilient environments of care for healthcare workers as well as patients.  
26  
27  
28  
29  
30  
31

32  
33 This analysis has practical implications, as the forms of care provided by healthcare  
34  
35 workers, as well as the quality of such care, are contingent on how healthcare environments  
36  
37 adapt to changing health needs and contexts. The effects of this adaptability are  
38  
39 compounded in times of emergency and disruption. Our orientation in this synthesis is  
40  
41 informed by recent work on materialities and ecologies of care[20-24] and how the care  
42  
43 environment affects the care delivery experience.[25-29] To our knowledge, this is the first  
44  
45 synthesis of qualitative research to consider how healthcare environments materially affect  
46  
47 the delivery of COVID-19 care.  
48  
49  
50

## 51 52 **METHODOLOGY**

53  
54 We draw upon Dixon-Woods et al.'s methods for critical interpretive synthesis (CIS) of  
55  
56 qualitative research to develop our approach to review.[30] Dixon-Woods et al. argue that  
57  
58 while conventional comprehensive review methods are useful for aggregative syntheses of  
59  
60

1  
2  
3 data, they present limitations when it comes to *interpretive* approaches to synthesising “a  
4 large and complex body of evidence.”[30] A critical interpretive approach to synthesising  
5 qualitative evidence is useful because it does not merely describe issues identified within  
6 the original studies, but also generates new ideas and “assemble[s] findings into a form that  
7 is useful in informing policy.”[30] Such an approach requires a sample that is *rich* and  
8 *diverse*, rather than exhaustive, as the focus is on generating theory rather than  
9 systematically summarising all available data.[30-32] CIS is thus more concerned with  
10 “*appropriateness of sampling*” than “*comprehensiveness*.”[31] This requires an iterative and  
11 flexible approach to review, where the research question, sampling strategy, and analysis  
12 are continuously and reflexively refined.[30, 33] The aim here is to develop insights that  
13 move beyond the designs of the original studies and have the capacity to produce novel  
14 contributions to health policy and clinical practice.

15  
16  
17  
18  
19  
20  
21  
22  
23  
24  
25  
26  
27  
28  
29  
30  
31  
32  
33  
34  
35  
36  
37  
38  
39  
40  
41  
42  
43  
44  
45  
46  
47  
48  
49  
50  
51  
52  
53  
54  
55  
56  
57  
58  
59  
60  
61  
62  
63  
64  
65  
66  
67  
68  
69  
70  
71  
72  
73  
74  
75  
76  
77  
78  
79  
80  
81  
82  
83  
84  
85  
86  
87  
88  
89  
90  
91  
92  
93  
94  
95  
96  
97  
98  
99  
100  
101  
102  
103  
104  
105  
106  
107  
108  
109  
110  
111  
112  
113  
114  
115  
116  
117  
118  
119  
120  
121  
122  
123  
124  
125  
126  
127  
128  
129  
130  
131  
132  
133  
134  
135  
136  
137  
138  
139  
140  
141  
142  
143  
144  
145  
146  
147  
148  
149  
150  
151  
152  
153  
154  
155  
156  
157  
158  
159  
160  
161  
162  
163  
164  
165  
166  
167  
168  
169  
170  
171  
172  
173  
174  
175  
176  
177  
178  
179  
180  
181  
182  
183  
184  
185  
186  
187  
188  
189  
190  
191  
192  
193  
194  
195  
196  
197  
198  
199  
200  
201  
202  
203  
204  
205  
206  
207  
208  
209  
210  
211  
212  
213  
214  
215  
216  
217  
218  
219  
220  
221  
222  
223  
224  
225  
226  
227  
228  
229  
230  
231  
232  
233  
234  
235  
236  
237  
238  
239  
240  
241  
242  
243  
244  
245  
246  
247  
248  
249  
250  
251  
252  
253  
254  
255  
256  
257  
258  
259  
260  
261  
262  
263  
264  
265  
266  
267  
268  
269  
270  
271  
272  
273  
274  
275  
276  
277  
278  
279  
280  
281  
282  
283  
284  
285  
286  
287  
288  
289  
290  
291  
292  
293  
294  
295  
296  
297  
298  
299  
300  
301  
302  
303  
304  
305  
306  
307  
308  
309  
310  
311  
312  
313  
314  
315  
316  
317  
318  
319  
320  
321  
322  
323  
324  
325  
326  
327  
328  
329  
330  
331  
332  
333  
334  
335  
336  
337  
338  
339  
340  
341  
342  
343  
344  
345  
346  
347  
348  
349  
350  
351  
352  
353  
354  
355  
356  
357  
358  
359  
360  
361  
362  
363  
364  
365  
366  
367  
368  
369  
370  
371  
372  
373  
374  
375  
376  
377  
378  
379  
380  
381  
382  
383  
384  
385  
386  
387  
388  
389  
390  
391  
392  
393  
394  
395  
396  
397  
398  
399  
400  
401  
402  
403  
404  
405  
406  
407  
408  
409  
410  
411  
412  
413  
414  
415  
416  
417  
418  
419  
420  
421  
422  
423  
424  
425  
426  
427  
428  
429  
430  
431  
432  
433  
434  
435  
436  
437  
438  
439  
440  
441  
442  
443  
444  
445  
446  
447  
448  
449  
450  
451  
452  
453  
454  
455  
456  
457  
458  
459  
460  
461  
462  
463  
464  
465  
466  
467  
468  
469  
470  
471  
472  
473  
474  
475  
476  
477  
478  
479  
480  
481  
482  
483  
484  
485  
486  
487  
488  
489  
490  
491  
492  
493  
494  
495  
496  
497  
498  
499  
500  
501  
502  
503  
504  
505  
506  
507  
508  
509  
510  
511  
512  
513  
514  
515  
516  
517  
518  
519  
520  
521  
522  
523  
524  
525  
526  
527  
528  
529  
530  
531  
532  
533  
534  
535  
536  
537  
538  
539  
540  
541  
542  
543  
544  
545  
546  
547  
548  
549  
550  
551  
552  
553  
554  
555  
556  
557  
558  
559  
560  
561  
562  
563  
564  
565  
566  
567  
568  
569  
570  
571  
572  
573  
574  
575  
576  
577  
578  
579  
580  
581  
582  
583  
584  
585  
586  
587  
588  
589  
590  
591  
592  
593  
594  
595  
596  
597  
598  
599  
600  
601  
602  
603  
604  
605  
606  
607  
608  
609  
610  
611  
612  
613  
614  
615  
616  
617  
618  
619  
620  
621  
622  
623  
624  
625  
626  
627  
628  
629  
630  
631  
632  
633  
634  
635  
636  
637  
638  
639  
640  
641  
642  
643  
644  
645  
646  
647  
648  
649  
650  
651  
652  
653  
654  
655  
656  
657  
658  
659  
660  
661  
662  
663  
664  
665  
666  
667  
668  
669  
670  
671  
672  
673  
674  
675  
676  
677  
678  
679  
680  
681  
682  
683  
684  
685  
686  
687  
688  
689  
690  
691  
692  
693  
694  
695  
696  
697  
698  
699  
700  
701  
702  
703  
704  
705  
706  
707  
708  
709  
710  
711  
712  
713  
714  
715  
716  
717  
718  
719  
720  
721  
722  
723  
724  
725  
726  
727  
728  
729  
730  
731  
732  
733  
734  
735  
736  
737  
738  
739  
740  
741  
742  
743  
744  
745  
746  
747  
748  
749  
750  
751  
752  
753  
754  
755  
756  
757  
758  
759  
760  
761  
762  
763  
764  
765  
766  
767  
768  
769  
770  
771  
772  
773  
774  
775  
776  
777  
778  
779  
780  
781  
782  
783  
784  
785  
786  
787  
788  
789  
790  
791  
792  
793  
794  
795  
796  
797  
798  
799  
800  
801  
802  
803  
804  
805  
806  
807  
808  
809  
810  
811  
812  
813  
814  
815  
816  
817  
818  
819  
820  
821  
822  
823  
824  
825  
826  
827  
828  
829  
830  
831  
832  
833  
834  
835  
836  
837  
838  
839  
840  
841  
842  
843  
844  
845  
846  
847  
848  
849  
850  
851  
852  
853  
854  
855  
856  
857  
858  
859  
860  
861  
862  
863  
864  
865  
866  
867  
868  
869  
870  
871  
872  
873  
874  
875  
876  
877  
878  
879  
880  
881  
882  
883  
884  
885  
886  
887  
888  
889  
890  
891  
892  
893  
894  
895  
896  
897  
898  
899  
900  
901  
902  
903  
904  
905  
906  
907  
908  
909  
910  
911  
912  
913  
914  
915  
916  
917  
918  
919  
920  
921  
922  
923  
924  
925  
926  
927  
928  
929  
930  
931  
932  
933  
934  
935  
936  
937  
938  
939  
940  
941  
942  
943  
944  
945  
946  
947  
948  
949  
950  
951  
952  
953  
954  
955  
956  
957  
958  
959  
960  
961  
962  
963  
964  
965  
966  
967  
968  
969  
970  
971  
972  
973  
974  
975  
976  
977  
978  
979  
980  
981  
982  
983  
984  
985  
986  
987  
988  
989  
990  
991  
992  
993  
994  
995  
996  
997  
998  
999  
1000

Guided by Dixon-Woods et al.’s methods, we have outlined each step of our approach to synthesis below.[30] It should be noted that these steps are not necessarily performed sequentially or independently. Instead, steps may overlap, run concurrently, and repeat in response to emerging analysis and theory generation.

### Review Question

We established an analytical focus for our review around the materiality of the healthcare environment. By this, we mean we attended to matter, such as objects (both medical and mundane), bodies, buildings, and infrastructures, and how matter relates with practices, knowledges, spaces, temporalities, and affects in the care environment.[20, 21] We furthermore considered how the care environment itself is made through these relations and what is at stake in that making.[20, 21] This analytical focus guided our search and was iteratively refined in response to emerging findings.[30] Unlike with conventional review



1  
2  
3 methodologies, and in keeping with CIS methods, we did not formulate a hypothesis in  
4  
5 advance, but reflexively refined the research question and analysis throughout.[30]  
6  
7

### 8 **Search Strategy**

9  
10 An explicit, highly structured, and protocol-driven search strategy is ill-suited to the review  
11  
12 of complex qualitative evidence, as it risks missing relevant materials and can be less  
13  
14 efficient than other strategies.[30, 34] We combined traditional search strategies with  
15  
16 other, more iterative methods to assemble a sampling frame. We began with a search of  
17  
18 PubMed and Google Scholar databases using the search query “(healthcare OR (health AND  
19  
20 care)) AND (worker OR professional OR staff) AND covid-19 AND qualitative.” These search  
21  
22 terms were kept intentionally broad to allow for greater inclusivity across topics and  
23  
24 disciplines in line with the exploratory nature of the review process.[30] Further searches  
25  
26 were also performed in hand selected journals and via backwards and forwards citation  
27  
28 chaining, using Google Scholar for the latter. Finally, we used informal networks such as  
29  
30 personal contacts and Twitter to monitor for additional literature that may have been  
31  
32 missed in the initial search, especially given the fast-moving production of research in the  
33  
34 COVID-19 context.[30, 34] We adopted a “snowballing” approach to our search, allowing  
35  
36 studies that emerged throughout the review process to be included in the final sample.[34]  
37  
38  
39  
40  
41  
42  
43  
44

### 45 **Eligibility Criteria**

46  
47 In the early stages of study selection, it was important keep the boundaries of our search  
48  
49 flexible to allow the review question to dynamically evolve in response to emerging findings.  
50  
51 However, given the speed and volume of research being produced within the COVID-19  
52  
53 context, there was a practical need to limit the number of papers included in the initial  
54  
55 review. Eligible articles included English-language original studies collecting primary  
56  
57 qualitative data including interviews, surveys with free-text responses, focus groups, and  
58  
59  
60

1  
2  
3 observation. Mixed-method studies were eligible for inclusion if evidence of all findings was  
4 demonstrated in the qualitative data. All articles were peer reviewed and published or in  
5  
6 press with the accepted manuscript available online by 31st December 2021.  
7  
8  
9

10 Eligible studies investigated the experiences of healthcare workers involved in the  
11 care of individuals with COVID-19. This posed two challenges. First, the category of  
12 healthcare workers has no singular definition across studies and geographical contexts, with  
13 some articles taking a broad approach and some focusing on specific professions. We  
14 adopted an inclusive definition of healthcare workers including, but not limited to, medical  
15 and paramedical practitioners, nurses, midwives, allied health professionals, emergency  
16 health workers, personal care workers, health management and support personnel,  
17 students and trainees, and other health and health associate professionals.  
18  
19  
20  
21  
22  
23  
24  
25  
26  
27  
28  
29

30 Second, in the context of the pandemic, where the healthcare systems of most  
31 countries are directly involved in COVID-19 management and care, it is difficult to define  
32 what constitutes COVID-19 care. Healthcare workers in settings that are not established to  
33 provide specific COVID-19 care may still encounter individuals experiencing COVID-19 illness  
34 who are also, or solely, in need of non-COVID-19 healthcare. Conversely, healthcare workers  
35 who are explicitly engaged in the care of patients with COVID-19 are often also involved in  
36 care of other patients who are not infected and have other healthcare needs. Most studies  
37 did not make clear and consistent distinctions between practices of care performed for  
38 patients with and without COVID-19, and the experiences of healthcare workers related to  
39 the specific care of COVID-19 patients cannot be disentangled from the broader experiences  
40 of providing healthcare during the COVID-19 pandemic. Furthermore, many of the concerns  
41 and practices of frontline COVID-19 healthcare workers and other healthcare workers are  
42 shared, including managing infection risks and the use of PPE.  
43  
44  
45  
46  
47  
48  
49  
50  
51  
52  
53  
54  
55  
56  
57  
58  
59  
60

1  
2  
3 We included articles that explicitly reported the experiences of caring for individuals  
4  
5 with confirmed or suspected COVID-19, irrespective of whether COVID-19 care was a  
6  
7 primary responsibility of the study participants. We additionally included studies in which  
8  
9 there was ambiguity as to whether the participants themselves were involved in the *direct*  
10  
11 care of COVID-19 patients, but the practices, spaces, and concerns identified in the findings  
12  
13 were consistent with other studies. Studies that did not focus on the experiences of  
14  
15 healthcare workers in care *provision* (e.g. studies investigating experiences of healthcare  
16  
17 workers as COVID-19 patients themselves) were excluded.  
18  
19  
20  
21  
22

### 23 **Sampling and Quality Determination**

24  
25 We employed an iterative and purposive sampling strategy to select papers for inclusion.  
26  
27 Rather than producing an exhaustive sample within a rigid and highly specified inclusion  
28  
29 criteria, purposive sampling enables the inclusion of “relevant” literature on the basis of  
30  
31 likelihood to contribute to the development of theory, with an ultimate aim of “conceptual  
32  
33 saturation.”[30, 33] This allows for the inclusion of a richer and more diverse sample of  
34  
35 literature. Thomas and Harden argue that aiming for conceptual saturation may be more  
36  
37 appropriate for reviewing qualitative literature than traditional sampling approaches, as the  
38  
39 conceptual findings of the synthesis will not change with the addition of further studies  
40  
41 beyond the point of saturation.[35]  
42  
43  
44  
45  
46

47 CIS rejects a “stage” approach to review, instead producing a method that is  
48  
49 iterative, dynamic, and responsive to the evolving concerns of the synthesis.[30] In practice,  
50  
51 this involved including and excluding literature on an ongoing basis to adapt to emerging  
52  
53 lines of analytical inquiry. The aim here is not reproducibility.[30] Instead, much like with  
54  
55 analysis of data in primary qualitative research, CIS methods produce an interpretation of  
56  
57 the evidence that is demonstrably grounded and prioritises “meaningful” analysis.[30] While  
58  
59  
60

total transparency of study selection is not feasible within such a method, we have simplified our selection process into 4 phases (Table 1).

|         |                                                                                                                                                                                                                                                  |
|---------|--------------------------------------------------------------------------------------------------------------------------------------------------------------------------------------------------------------------------------------------------|
| Phase 1 | Articles were screened for eligibility and relevance on the basis of titles and abstracts. Selected articles were imported with PDFs into EndNote 20 for full-text indexing (n=134).                                                             |
| Phase 2 | A sample of articles (n=53) was read in full and emerging themes were identified, manually coded, and synthesised into possible search terms with particular attention to our analytical interest in the materiality of healthcare environments. |
| Phase 3 | All indexed PDFs were searched using synthesised search terms and matching articles were screened for inclusion on the basis of the full text for quality, richness of primary data, and relevance (n=96).                                       |
| Phase 4 | All articles included in Phase 3 were screened for final inclusion on the basis of contribution to theory development (n=38).                                                                                                                    |

While the phases of sampling represented in Table 1 are listed in sequential order, Phase 2 and Phase 3 are not a discrete and singular steps, but rather “a constant dialectic process conducted concurrently with theory generation.”[30] Articles sampled in Phase 2 were iteratively and purposively selected on the basis of titles and abstracts with attention to diversifying study context and aims until emerging themes no longer meaningfully deviated from existing coded themes. Search terms synthesised in Phase 2 were also continuously tested for usefulness and refined in response to emerging themes (Table 2); for example, despite the attention to material objects within the synthesis, “material” was

determined to be an unhelpful search term as it captured all articles that referenced “supplementary materials.” Similarly, articles selected in Phase 1 were iteratively included and excluded on the basis of relevance in Phase 3 as the concerns of the synthesis evolved.

**Table 2: Synthesised Search Terms**

| Search Term(s)                            | Sample (N) |
|-------------------------------------------|------------|
| bed                                       | 75         |
| body OR bodies OR bodily                  | 68         |
| disinfect                                 | 25         |
| dispose OR disposal                       | 9          |
| facility OR facilities                    | 61         |
| gear                                      | 33         |
| mask                                      | 93         |
| ppe                                       | 101        |
| redeploy                                  | 26         |
| room                                      | 90         |
| space OR spatial                          | 58         |
| telehealth OR teleconsult OR telemedicine | 23         |
| ventilator                                | 46         |
| virtual OR digital OR remote              | 70         |
| war OR battle OR soldier                  | 62         |
| waste                                     | 12         |
| zone                                      | 23         |

1  
2  
3  
4  
5  
6  
7  
8  
9  
10  
11  
12  
13  
14  
15  
16  
17  
18  
19  
20  
21  
22  
23  
24  
25  
26  
27  
28  
29  
30  
31  
32  
33  
34

Following Dixon-Woods et al., we adopted an approach to quality appraisal in Phase 3 that maximised inclusion at a conceptual level, rather than taking a hierarchical approach determined by particular methodological standards.[30] Though articles would only be *included* on the basis of their interpretive value, articles would also only be *excluded* if they were deemed to be “fatally flawed.”[30] We developed a set of appraisal prompts adapted from those proposed by Dixon-Woods et al. for assessing if an article should be excluded on this basis (Table 3).[30] Finally, Phase 4 of the sampling process appraised all articles included in Phase 3 for their overall contribution to the conceptual findings of the review. As the methodological aim of this review was to reach “conceptual saturation,” we deemed it unnecessary to include multiple articles that all presented the same findings without meaningful variation. Articles that produced no additional insights to other included articles and did not provide rich empirical data for interpretive analysis were excluded in this phase (Table 4).

**Table 3: Quality Appraisal Prompts**

|    |                                                                    |
|----|--------------------------------------------------------------------|
| 35 | <b>Table 3: Quality Appraisal Prompts</b>                          |
| 36 | Are the objectives of the research clearly stated?                 |
| 37 | Is the research design clearly described and appropriate?          |
| 38 | Are data collection methods transparent?                           |
| 39 | Are data analysis methods clearly described and appropriate?       |
| 40 | Are there sufficient data to support the authors’ interpretations? |
| 41 |                                                                    |
| 42 |                                                                    |
| 43 |                                                                    |
| 44 |                                                                    |
| 45 |                                                                    |
| 46 |                                                                    |
| 47 |                                                                    |
| 48 |                                                                    |
| 49 |                                                                    |

**Table 4: Study Characteristics**

| 53 | Author (Date)           | Aims                                                                                                                | Country or Region | Sample (N)* | Qualitative Data Collection Method* |
|----|-------------------------|---------------------------------------------------------------------------------------------------------------------|-------------------|-------------|-------------------------------------|
| 54 | Al Ghafri et al. (2020) | To explore the experiences and perceptions of medical professionals working frontline in the management of COVID-19 | Oman              | 40          | Focus groups                        |
| 55 | Arnetz et al. (2020)    | To explore perceptions of stress for nurses working in the early stages of the COVID-19 pandemic                    | United States     | 455         | Survey with free-text response      |
| 56 | Aughterson et           | To explore the psychosocial impact of the COVID-19                                                                  | United            | 25          | Semi-structured                     |

|                                  |                                                                                                                                                              |                |     |                                      |
|----------------------------------|--------------------------------------------------------------------------------------------------------------------------------------------------------------|----------------|-----|--------------------------------------|
| al. (2021)                       | pandemic on frontline health and social care workers                                                                                                         | Kingdom        |     | interviews                           |
| Baldwin & George (2021)          | To develop an understanding of the experiences and needs of healthcare workers during and after the COVID-19 outbreak                                        | United Kingdom | 19  | In-depth, semi-structured interviews |
| Banerjee et al. (2020)           | To explore perceptions, experiences, and challenges of healthcare workers involved in dementia care during the COVID-19 pandemic                             | India          | 148 | In-depth, semi-structured interviews |
| Billings et al. (2021)           | To explore the experiences, views, and needs of mental health professionals supporting frontline health and social care workers during the COVID-19 pandemic | United Kingdom | 28  | Semi-structured interviews           |
| Blake et al. (2021)              | To evaluate wellbeing centres established to provide psychological support to healthcare workers during the COVID-19 pandemic                                | England        | 24  | Semi-structured interviews           |
| Butler et al. (2020)             | To explore perspectives and experiences of clinicians on resource limitation and patient care during the COVID-19 pandemic                                   | United States  | 60  | Semi-structured interviews           |
| Chandler-Jeanville et al. (2021) | To explore the lived experiences and perceptions of the COVID-19 pandemic amongst frontline nurses and their relatives                                       | France         | 49  | Semi-structured interviews           |
| Chen et al. (2021)               | To explore the experiences of wearing PPE for nurses caring for patients with COVID-19                                                                       | China          | 15  | Semi-structured interviews           |
| Cheong (2020)                    | To explore the impact of the COVID-19 pandemic on hospital-based clinical pharmacists                                                                        | Malaysia       | 19  | Semi-structured interviews           |
| Conlon et al. (2021)             | To understand the experiences of emergency care staff during the COVID-19 pandemic                                                                           | Ireland        | 15  | Semi-structured interviews           |
| Crowe et al. (2021)              | To examine the mental health of critical care nurses providing direct COVID-19 care during the early phase of the pandemic                                   | Canada         | 15  | Semi-structured interviews           |
| Deliktas Demirci et al. (2021)   | To explore the experiences and coping strategies of nurses working on COVID-19 wards                                                                         | Turkey         | 15  | In-depth, semi-structured interviews |
| Digby et al. (2021)              | To investigate the well-being of hospital staff during the early stage of the COVID-19 pandemic                                                              | Australia      | 321 | Survey with free-text response       |
| Fernández-Castillo et al. (2021) | To examine the experiences of intensive care nurses during the COVID-19 pandemic                                                                             | Spain          | 17  | Semi-structured interviews           |
| Galehdar et al. (2020)           | To explore experiences of distress among nurses caring for patients with COVID-19                                                                            | Iran           | 20  | In-depth, semi-structured interviews |
| Hayirli et al. (2021)            | To describe how personal protective equipment and distancing affect teamwork in the emergency setting                                                        | United States  | 55  | Semi-structured interviews           |
| Hoerke et al. (2021)             | To explore the experiences and concerns related to healthcare workers' use of PPE during the COVID-19 pandemic and its impact on care delivery               | United Kingdom | 46  | In-depth, semi-structured interviews |
| Jia et al. (2021)                | To examine nurses' ethical challenges in delivering COVID-19 care                                                                                            | China          | 18  | In-depth, structured interviews      |
| Kurotschka et al. (2021)         | To explore the care experiences of general practitioners during the first phase of the COVID-19 pandemic                                                     | Italy          | 149 | Survey with free-text response       |
| Liberati et al. (2021)           | To investigate the experiences of healthcare workers in secondary mental health services during the COVID-19 pandemic                                        | England        | 35  | Semi-structured interviews           |
| Liu et al. (2020)                | To explore the experiences of healthcare workers recruited to provide direct care for COVID-19 patients                                                      | China          | 13  | In-depth, semi-structured interviews |
| Montgomery et al. (2021)         | To investigate the experiences of healthcare workers in critical care settings during the COVID-19 pandemic                                                  | United Kingdom | 40  | Semi-structured interviews           |
| Ness et al. (2021)               | To investigate challenges faced by healthcare workers during the COVID-19 pandemic                                                                           | United States  | 23  | Semi-structured interviews           |
| Newman et al. (2021)             | To explore the psychological impact of the COVID-19 pandemic on frontline healthcare workers                                                                 | United Kingdom | 395 | Survey with free-text response       |

|                                                                                                                                                                                                                         |                                                                                                                                           |                |    |                                      |
|-------------------------------------------------------------------------------------------------------------------------------------------------------------------------------------------------------------------------|-------------------------------------------------------------------------------------------------------------------------------------------|----------------|----|--------------------------------------|
| Norful et al. (2021)                                                                                                                                                                                                    | To investigate the impact of stress on frontline healthcare workers during the initial outbreak of COVID-19                               | United States  | 55 | Open-ended interviews                |
| Palacios-Ceña et al. (2021)                                                                                                                                                                                             | To examine the experiences of frontline physical therapists during the COVID-19 pandemic                                                  | Spain          | 30 | In-depth, semi-structured interviews |
| Parsons Leigh et al. (2021)                                                                                                                                                                                             | To investigate the perceptions and experiences of critical care physicians in the context of resource strain during the COVID-19 pandemic | Canada         | 15 | Semi-structured interviews           |
| Pastrana et al. (2021)                                                                                                                                                                                                  | To explore the impact of COVID-19 on palliative care                                                                                      | 41 countries   | 79 | Survey with free-text response       |
| Rao et al. (2021)                                                                                                                                                                                                       | To examine the perspectives of frontline clinicians providing care to patients with COVID-19                                              | United States  | 50 | Semi-structured interviews           |
| Rees et al. (2021)                                                                                                                                                                                                      | To explore the experiences of paramedics providing care during the COVID-19 pandemic                                                      | Wales          | 20 | Semi-structured interviews           |
| Ross et al. (2021)                                                                                                                                                                                                      | To investigate the experiences of paediatric hospital social workers during the COVID-19 pandemic                                         | United States  | 55 | Focus groups                         |
| Saleem et al. (2021)                                                                                                                                                                                                    | To explore the experiences of frontline Pakistani emigrant physicians working in the UK during the COVID-19 pandemic                      | United Kingdom | 10 | In-depth, semi-structured interviews |
| Sheng et al. (2020)                                                                                                                                                                                                     | To explore the impact of involvement in COVID-19 rescue on professional identity among nurses                                             | China          | 14 | Semi-structured interviews           |
| Testoni et al. (2021)                                                                                                                                                                                                   | To examine COVID-19-related stress in doctors and nurses                                                                                  | Italy          | 17 | In-depth, semi-structured interviews |
| Williams Veazey et al. (2021)                                                                                                                                                                                           | To explore how entanglements of affect, space, and evidence shape care in the COVID-19 context                                            | Australia      | 63 | In-depth, semi-structured interviews |
| Yip et al. (2021)                                                                                                                                                                                                       | To examine the experiences of junior nurses providing care to COVID-19 patients in acute care settings                                    | Hong Kong      | 40 | Semi-structured interviews           |
| <i>*For mixed-method studies and studies investigating multiple populations, only primary qualitative data collected from healthcare worker participants (as defined under "Eligibility Criteria") are represented.</i> |                                                                                                                                           |                |    |                                      |

### Data Extraction and Analysis

Data were collected and organised by synthesised search terms (Table 2). Emerging themes were identified across the collected data and a "synthesising argument" was developed.[30]

The goal of the synthesising argument is to make sense of ideas across the review by bringing together arguments and evidence within multiple studies in ways that are explanatory and theoretically generative, and attend to the relationships between constructs.[30] We analysed both the primary data presented within the studies, and the interpretations by the study authors, to generate new interpretative findings (what Dixon-Woods et al. describe as "synthetic constructs").[30] We then generated three themes to organise these synthetic constructs, which allowed us to present our synthesising argument



1  
2  
3 in a way that was internally coherent and facilitated a stronger theoretical understanding of  
4  
5 material practices and spaces of healthcare environments.  
6  
7

### 8 **Patient and Public Involvement**

9  
10 There was no patient or public involvement in this study.  
11  
12

## 13 **FINDINGS**

14  
15 Our synthesising argument is organised across three interconnected themes: 1) the hospital  
16 transformed; 2) virtual care spaces; and 3) objects of care. To present these themes, we  
17  
18 have included illustrative extracts of participant responses from included studies, which are  
19  
20 italicised in-text.  
21  
22  
23

### 24 **Theme 1: The Hospital Transformed**

25  
26 During the COVID-19 pandemic, the hospital environment has undergone spatial, material,  
27  
28 and temporal transformations to accommodate changing healthcare needs. Three distinct  
29  
30 but intersecting burdens on physical space in the hospital setting emerged in the literature:  
31  
32 the increase in hospitalisations in COVID-19-affected geographical locations; the need for  
33  
34 hospital zoning to separate confirmed or suspected COVID-19 cases from other patients;  
35  
36 and the need for general physical distancing between all staff, patients, and visitors in the  
37  
38 hospital. These burdens led to material and organisational changes in the hospital, which  
39  
40 impacted how healthcare was done in these environments.  
41  
42  
43  
44  
45  
46

47 The introduction of COVID-19 cases into hospitals presented a need for higher  
48  
49 capacity emergency departments and intensive care units to keep up with the demand, as  
50  
51 well as additional isolation facilities to prevent further infection within the hospital.[36, 37]  
52  
53 Hospitals and healthcare delivery environments implemented and strengthened triage  
54  
55 systems to establish “hot zones,” which separated patients with confirmed or suspected  
56  
57 COVID-19 from other patients.[36, 38-40] This required the adaptation of existing spaces  
58  
59  
60

1  
2  
3 and infrastructure, and changes to hospital staffing to support this zoning, leading to further  
4 recruitment and redeployment of healthcare workers.[36, 41] Redeployed healthcare  
5 workers reported low support, inadequate specialised knowledge and training for COVID-19  
6 care, a lack of familiarity with patient treatments, poor communication, and feelings of  
7 uncertainty, which impacted the quality of patient care delivery[38, 42-44]: *“They gave us 2*  
8 *1/2 hours overview lecture on [Intensive Therapy Unit] setting then that is that, working in*  
9 *an environment that you don’t know [...] Asked to give medications which you’re not*  
10 *competent to do so.”*[44]  
11  
12  
13  
14  
15  
16  
17  
18  
19  
20  
21  
22

23 Studies also evaluated the materiality of healthcare environments in relation to staff  
24 comfort and safety. Existing spaces for staff in the hospital, including changing and  
25 showering facilities and break rooms, often did not meet the increased need to physically  
26 distance, decontaminate, and relax, and in some cases further spaces were found or  
27 built.[43, 45, 46] The materiality of COVID-19 care spaces within the hospital also enhanced  
28 the sense of risk in these environments: *“You were continuously exposed, closed spaces fully*  
29 *covered with patients with COVID-19, where invasive techniques were conducted, there were*  
30 *aerosols, vomits.”*[41] This sense of risk extended to homes as well, which became sites of  
31 potential contagion that put those cohabiting with healthcare workers at risk.[46] One study  
32 described healthcare workers managing this risk by creating “hot and cold zones” within  
33 their homes, or even residing in hotels, thus isolating themselves from families and loved  
34 ones.[47]  
35  
36  
37  
38  
39  
40  
41  
42  
43  
44  
45  
46  
47  
48  
49  
50  
51

52 In addition to the materiality and spatial layout of healthcare environments,  
53 logistical adaptations in the day-to-day running of hospitals further impacted the ways in  
54 which bodies travelled and interacted with each other. Some services and modes of care  
55 were prioritised as essential, leading non-essential services to be conducted remotely (see  
56  
57  
58  
59  
60

1  
2  
3 “Virtual Care Spaces”).[48] The changes to hospital zoning highlighted the need for  
4  
5 adequate staff to ensure healthcare workers were not moving between zones, thus  
6  
7 impacting infection control measures.[36] Spatial limitations in the hospital further  
8  
9 impacted communication between healthcare workers. Material barriers within the hospital  
10  
11 built environment required the implementation of different technologies and procedural  
12  
13 changes, such as the use of baby monitors or whiteboards, in order for healthcare workers  
14  
15 to communicate with each other and with patients.[46, 49] These spatial barriers to face-to-  
16  
17 face communication impacted the quality of care as communication and emotional  
18  
19 connection were compromised: *“Typically, when a trauma patient comes in we're in the*  
20  
21 *room first thing and we're sort of hearing the story. [...] And now we're not in the room*  
22  
23 *because of PPE. [...] we're getting a lot of information from these very sick patients*  
24  
25 *secondhand.”*[49]  
26  
27  
28  
29  
30  
31

32  
33 While the transformations outlined above largely point to adaptative changes  
34  
35 implemented in response to evolving healthcare needs, hospital environments also  
36  
37 underwent atmospheric transformations that produced affective engagements with the  
38  
39 care space. Participants in the literature employed the metaphor of the healthcare worker  
40  
41 as a “soldier” fighting a war and described the hospital environment as a “war zone” or  
42  
43 “battlefield”[41, 45, 50-54]: *“It was like that scene on ET, all that plastic.... So, there's all this*  
44  
45 *plastic and, I get it, but just walking into this other world, there was just mayhem,*  
46  
47 *pandemonium. People running around, alarms going off.... it was like a war zone.”*[45] Care  
48  
49 practices were also understood as generating affects that could resonate through the care  
50  
51 environment. One study highlighted a (variably defined) distinction between triaging care  
52  
53 and “rationing,” where the latter was described as a “taboo.”[39] This led in some cases to  
54  
55 care being provided beyond what was considered normal or beneficial clinical practice:  
56  
57  
58  
59  
60

1  
2  
3 “because of the sensitivity, the concern that people are going to be withholding care and this  
4  
5 institution doesn’t want to be seen like that.”[39]  
6  
7

8 Events of high emotion and trauma haunted spaces in the hospital environment:  
9  
10 “Even now, when I am on duty, when I enter some room(s), I see patients who could not  
11  
12 breathe, in bed, who died suddenly. I still have these flashes that still shock me, especially  
13  
14 when I enter two rooms in particular.”[55] One study connected these local affects in the  
15  
16 hospital space to global atmospheres that are generated in the pandemic and travel through  
17  
18 media networks: “I just had this moment of those pictures that you see from the New York  
19  
20 Times or whatever, of hospitals in America flashing up in your brain and going, ‘This is not  
21  
22 dissimilar. Are we going where they’re going?’”[54] As with the other transformations  
23  
24 highlighted in this section, these atmospheric transformations were produced in and  
25  
26 through the materiality of sites of COVID-19 care, across time and space.  
27  
28  
29  
30  
31

## 32 **Theme 2: Virtual Care Spaces**

33  
34 The use of virtual spaces in healthcare has significantly expanded during the COVID-19  
35  
36 pandemic. As physical touch and interaction between bodies became understood as “risky,”  
37  
38 contact between bodies was mediated in healthcare environments via technologies  
39  
40 enabling remote care, including telephones, tablets, and online services.[54, 56] In addition  
41  
42 to reducing the risk of SARS-CoV-2 transmission, remote consultation services were  
43  
44 identified as having the capacity to increase healthcare access by reducing barriers relating  
45  
46 to travel, geographical location, time, disability, and resources[57, 58]: “Patients could make  
47  
48 appointments and communicate with GPs online, then they were offered guidance on health  
49  
50 care and psychological support, and purchased drugs online under the instructions of  
51  
52 doctors, which may be a new way of work for GPs.”[59] However, the digital divide was  
53  
54 identified as an issue affecting both healthcare workers and patients, as digital literacy and  
55  
56  
57  
58  
59  
60

1  
2  
3 internet access varied from person to person and region to region.[57, 60] Already-  
4  
5 vulnerable patients could thus be made more vulnerable: *“When reopening begins, those*  
6  
7 *who have suffered as a result of these disparities will return to our care sicker and with*  
8  
9 *deeper social needs.”*[60]  
10  
11

12  
13 Quality of care in virtual care environments was a common concern in the literature.  
14  
15 Studies highlighted the practical implications of healthcare workers not being in the same  
16  
17 room as patients, which could lead them to miss symptoms or changes in patients, misread  
18  
19 body language or non-verbal communication, or experience increased language and  
20  
21 intercultural communication barriers[57, 61]: *“Patients keep requesting for physical*  
22  
23 *examination. [...] How will I prescribe without being sure...”*[57] One study also highlighted a  
24  
25 “‘ripple’ effect” from the lack of physical assessment, where patients requiring general  
26  
27 treatment were referred to emergency, thus increasing the burden placed on the  
28  
29 emergency department.[36]  
30  
31  
32  
33

34  
35 One way that consultations were adapted to navigate concerns about infection  
36  
37 control and quality of care was through the development of hybrid systems in which nurses  
38  
39 or trainee doctors provided patient care in-person, with doctors and consultants using  
40  
41 remote technologies to observe patients and support care without entering the ward.[48]  
42  
43 This required the healthcare workers providing in-person care to embody the authority and  
44  
45 expertise of the doctor, while also observing the patient: *“The consultant was probably*  
46  
47 *heavily relying on the nurses and the doctors there, rather than himself, to look at smaller*  
48  
49 *behaviours ... little things like facial reactions, body language, things like that.”*[48] In these  
50  
51 ways, virtual and hybrid environments not only enacted changes in the individual care  
52  
53 encounter between patient and healthcare worker, but also transformed the bedside as a  
54  
55  
56  
57  
58  
59  
60

1  
2  
3 site of care and produced extended effects in the care journey and other care practices and  
4  
5 experiences in the healthcare environment.  
6  
7

8 Fully remote care systems also presented practical challenges when it came to  
9  
10 monitoring and administering medication.[57, 62] The lack of face-to-face interactions  
11  
12 (between both patients and doctors, and patients and their families) also produced barriers  
13  
14 to emotional and social care[56, 61, 63]: *“the most important part of caring is PRESENCE.*  
15  
16 *Touch, intimate conversation, allowing the patient to sit close, face-to-face interaction.”*[56]  
17  
18 This was signalled as being particularly problematic in the context of COVID-19 given the  
19  
20 heightened need for this kind of support; for example, one study emphasised the need for  
21  
22 some patients with mental health issues to experience simple moments of physical contact:  
23  
24 *“I think that some people just need the power of touch or a hug or a face-to-face human*  
25  
26 *person to ensure that they’re kept safe and okay.”*[61] Telehealth was framed as a  
27  
28 compromised form of care that traded (but would “never be able to replace”) “physical  
29  
30 touch and presence” for safety.[56]  
31  
32  
33  
34  
35  
36

37 Yet one study also identified a potential for increased emotional support through  
38  
39 remote care for patients who were already in isolation.[58] Participants identified  
40  
41 technologies of remote care as enabling new forms of interpersonal connection, fostering  
42  
43 modes of care that emphasised thoughtful verbal communication as an intentional practice  
44  
45 of care: *“The rediscovered importance of words, of a telephone conversation that becomes*  
46  
47 *an essential connection, and which is able to concentrate all the possible humanity,*  
48  
49 *closeness and help.”*[58] The study also reconceptualised virtual care as taking place not  
50  
51 “remotely,” but rather “in the home,” allowing a new and different form of intimacy to that  
52  
53 produced through face-to-face care in the hospital setting: *“Every day I called them, I*  
54  
55  
56  
57  
58  
59  
60

1  
2  
3 *entered their homes, I saw their eyes, I evaluated their breathing. [...] I have been living with*  
4  
5  
6 *them for these 20 days.”*[58]  
7

8           While remote care had the capacity to enable healthcare workers to ‘enter the  
9  
10 homes’ of patients, so too did it bring the healthcare environment into the homes of  
11  
12 participants who worked remotely. Some studies found working from home gave  
13  
14 participants greater flexibility in work, limited workplace distractions, and reduced fears of  
15  
16 becoming infected or sick.[38, 43] However, for others, working from home presented  
17  
18 several challenges including technological issues (e.g. internet speed), distractions from  
19  
20 other occupants in the house, and insufficient or inappropriate physical space.[43, 60]  
21  
22  
23

24           Many healthcare workers reported difficulties in establishing boundaries between  
25  
26 professional and personal space, especially when the broader pandemic context introduced  
27  
28 additional home responsibilities (e.g. homeschooling).[43, 48, 56, 60, 64] Working from  
29  
30 home brought colleagues and patients (virtually) into the personal spaces of healthcare  
31  
32 workers in ways that challenged comfort and privacy[56, 64]: *“Something I found hard was*  
33  
34 *the room I work in is also my bedroom. It can be a lot to have these difficult conversations in*  
35  
36 *your own room where your bed is, not having that space.”*[64] There were other practical  
37  
38 implications to this decrease in privacy as well; for example, one study noted the difficulty  
39  
40 of conducting confidential conversations when working in a shared living space.[48]  
41  
42  
43  
44  
45  
46

47           The erosion of boundaries between work and home also dissolved temporal markers  
48  
49 of ‘worktime.’ As homes became workplaces, other aspects of homelife (such as childcare)  
50  
51 became folded into the workday, thus disrupting work and family routines.[56, 60] More  
52  
53 rigid scheduling in virtual environments limited opportunities for informal discussions and  
54  
55 debriefs, and the absence of a daily commute (which previously operated as a temporal  
56  
57 boundary of worktime) caused the workday to stretch beyond regular hours.[48, 60] Such  
58  
59  
60

1  
2  
3 spillage of worktime created a sense of pressure to always be available and “at work”[48,  
4  
5 60]: *“Working from home means that I am never ‘not working.’”*[60] These challenges  
6  
7 produced an increase in burnout, guilt, uncertainty in decision-making, and feelings of being  
8  
9 underappreciated.[38, 43, 48, 60, 61]  
10  
11

12  
13 Virtual care spaces were also produced through the engagement of healthcare  
14  
15 workers with social media platforms. Studies described social media use as a practice of  
16  
17 knowledge sharing, enabling healthcare workers to access rapidly emerging information  
18  
19 about the pandemic through informal networks and put this emergent information into  
20  
21 practice.[52, 54, 65] These networks were identified as constituting experiential evidence  
22  
23 that could be disseminated and accessed more rapidly than traditional evidence through  
24  
25 official channels: *“our colleagues who are in the hot areas [...] send out some of their*  
26  
27 *experiences, how they are managing it, on Facebook or WhatsApp. So, we are just reading to*  
28  
29 *see if we can incorporate their experience and then go from there.”*[65] However, these  
30  
31 modes of knowledge sharing were also conceptualised as risky, with the potential to amplify  
32  
33 misinformation and produce uncertainty through conflicting accounts of successful COVID-  
34  
35 19 care practices.[52, 54] Accessing information through social media also led some  
36  
37 participants to feel overwhelmed and anxious, particularly due to the circulation of news of  
38  
39 patient and healthcare worker deaths.[54, 59, 66]  
40  
41  
42  
43  
44  
45  
46

47  
48 Social media furthermore produced spaces of connection between healthcare  
49  
50 workers and the public. These spaces enabled the circulation of viral images (such as photos  
51  
52 of healthcare workers with sores from extended PPE use) and allowed healthcare workers  
53  
54 to disseminate information and share their personal experiences of working during the  
55  
56 pandemic.[66] They also created opportunities for both displays of gratitude and support  
57  
58 from the public and occasionally negative comments and abuse.[52, 65] These virtual spaces  
59  
60



1  
2  
3 of public engagement thus constituted potential sites of psychosocial support or anxiety for  
4  
5 healthcare workers.  
6

### 7 8 **Theme 3: Objects of Care** 9

10 Material objects formed a central mechanism of COVID-19 care across the literature. The  
11  
12 most prominent object of care identified in the literature was PPE; studies described  
13  
14 shortages of PPE (particularly at the beginning of the pandemic) as a barrier to both the  
15  
16 safety of healthcare workers and their capacity to delivery care, with inadequate PPE  
17  
18 supplies causing anxiety and prompting participants to limit patient interactions and re-use  
19  
20 and/or share PPE [38, 42, 43, 45, 46, 49, 52, 58, 65, 67, 68]: *"I have the same N95 since*  
21  
22 *March. We also are only allowed one surgical mask for one week. We still are rationing*  
23  
24 *PPE."*[42] Several studies also identified inequities in PPE distribution, with lower-waged and  
25  
26 non-acute care roles being more likely to experience shortages.[38, 43, 46, 51, 62] Guidance  
27  
28 around PPE use was often unclear, inconsistent, or changed from day to day, producing  
29  
30 anxiety in healthcare workers around the proper use of PPE.[36, 42-46, 67-69] Some studies  
31  
32 also noted problems related to the size and fit of PPE, especially for women and people with  
33  
34 facial hair (including people who do not shave for religious reasons).[46, 50, 66, 67]  
35  
36  
37  
38  
39  
40

41  
42 When PPE was available, its use presented a barrier to everyday practices of care.  
43  
44 Interactions with patients and their families were made more difficult as PPE obscured  
45  
46 faces, muffled voices, and obstructed body language, thus impacting communication and  
47  
48 emotional connection[36, 46, 48, 49, 51, 55, 70, 71]: *"I think arriving in full PPE, you're a bit*  
49  
50 *like an alien or a person from a nuclear reactor or something, and I think it's hard to build a*  
51  
52 *rapport with that."*[48] Communication with colleagues was also affected by PPE use,  
53  
54 especially between newer team members, impacting professional relationships and  
55  
56 increasing the risk of miscommunication in care practice.[36, 46, 49, 63, 71] Attempts to  
57  
58  
59  
60

1  
2  
3 bridge these emotional and communication gaps included individually decorating PPE or  
4  
5 attaching disposable photos of staff faces to gowns, which also had the practical benefit of  
6  
7 allowing patients and colleagues to differentiate between healthcare workers.[46, 63] The  
8  
9 literature also described PPE as limiting healthcare workers' senses (e.g. through the fogging  
10  
11 of glasses and face shields) and dexterity, producing challenges with some patient  
12  
13 procedures and increasing the risk of healthcare workers missing important health signs in  
14  
15 patients[40, 46, 48, 55, 62, 63, 67, 69]: *"I had to rely on the anatomical location to find the*  
16  
17 *femoral artery because I could not feel the pulsation when performing the arterial blood*  
18  
19 *taken for gas analysis."*[67] Healthcare workers additionally raised concerns about protocols  
20  
21 in emergency situations, where the time taken to don and doff PPE could leave patients  
22  
23 waiting longer for vital support.[46, 48, 69]  
24  
25  
26  
27  
28  
29

30 The wearing of PPE took a significant physical and emotional toll on healthcare  
31  
32 workers. PPE was described as exhausting, uncomfortable, hot, difficult to breathe in, and  
33  
34 produced skin damage such as bruising and dermatitis[38, 40, 42, 43, 46, 61, 63, 65, 67-69,  
35  
36 71]: *"Wearing the whole set of PPEs is very uncomfortable. I have difficulty breathing and*  
37  
38 *feel very hot and my heart rate speeds up. We keep on sweating and the clothes are*  
39  
40 *soaked."*[40] Adhering to infection control protocols (e.g. correctly donning and doffing PPE)  
41  
42 took a considerable amount of time and impacted how long healthcare workers could spend  
43  
44 with patients and their families.[36, 46, 68, 69] Healthcare workers adopted different  
45  
46 techniques to combat this issue. Some participants reported that shifts and processes were  
47  
48 reorganised so that care delivery could be clustered, allowing healthcare workers to visit  
49  
50 more patients in one go.[36, 68] However, studies also described healthcare workers  
51  
52 skipping breaks, not drinking water or using the toilet, and wearing adult diapers in an effort  
53  
54 to avoid donning and doffing (and possibly disposing of) PPE.[38, 43, 45, 46, 67, 68]  
55  
56  
57  
58  
59  
60

1  
2  
3 In addition to PPE shortages, the literature also revealed shortages of other essential  
4 material objects of care (as well as the human resources necessary to use them), including  
5 ventilators, dialysis machines, isolation and critical care beds, testing equipment, cleaning  
6 supplies, and body bags.[38, 39, 42, 47, 51, 55, 57, 58] Triage became an important part of  
7 the allocation of limited resources, however this required healthcare workers to make  
8 ethical decisions about which patients were in most need of equipment such as ventilators  
9 (which sometimes meant adapting guidelines on a case by case basis)[39, 53, 55, 57]: *"I had  
10 to decide if the 88 year old grandma on dialysis gets the ventilator or the 44 year old [in full  
11 code]. And even just the weight that you have to carry if that's your decision right? That you  
12 just condemned this person to die and not this person."*[53]

13  
14  
15  
16  
17  
18  
19  
20  
21  
22  
23  
24  
25  
26  
27  
28  
29  
30  
31  
32  
33  
34  
35  
36  
37  
38  
39  
40  
41  
42  
43  
44  
45  
46  
47  
48  
49  
50  
51  
52  
53  
54  
55  
56  
57  
58  
59  
60  
Studies described changes to practice and other innovations that enabled healthcare  
workers to adapt to these resource challenges. Patients on ventilators who would normally  
receive one-on-one care had nurses working between them, and some patients were put on  
travel ventilators.[39] Staff at one hospital developed "grab bags" of equipment to help with  
clustered care and created a portable "resus trolley" so that patients did not need to be  
moved to a dedicated resuscitation area (which also helped limit virus transmission).[36]  
One study even described a healthcare worker's son using a 3D printer to make face shields  
and connections for a dialysis machine.[39] Across the literature, however, resource  
limitations were described as leading to compromised care: *"Everybody gets a little bit of  
bad care."*[39]

In addition to concerns regarding access to necessary material resources for  
providing care, much of the literature also described uncertainties around the  
appropriateness of the therapies themselves when it came to the acute care of patients  
with COVID-19[40, 42, 53, 55, 59, 63, 65, 71]: *"The fact that a medication wasn't proven. We*

1  
2  
3 *didn't have good data. [...] If you're going to do something that's unproven, you should do it*  
4 *within a trial. We could really be doing more harm than good.*"[53] Studies described an  
5  
6 absence of evidence-based treatment for COVID-19, though often did not make clear  
7  
8 distinctions between pharmaceutical drugs and other clinical interventions when referring  
9  
10 to treatment. Similarly, there was an implied but usually unarticulated distinction between  
11  
12 "good data"[53] and informal knowledge sharing between healthcare professionals. In the  
13  
14 absence of "proven" pharmaceutical interventions, some studies reported an increase in  
15  
16 supportive care, which often involved higher patient contact and emotional work, and  
17  
18 disproportionately impacted nurses (including via increased risk of infection).[50, 70, 72, 73]  
19  
20  
21  
22  
23  
24

25 A notable motif throughout the literature was the affecting presence of pandemic  
26  
27 death, which came to be known through the materiality of objects of care such as body bags  
28  
29 and beds. Many healthcare workers had no experience handling dead bodies prior to the  
30  
31 pandemic and this lack of knowledge, along with changes to processes for managing death  
32  
33 in the hospital, meant that bodies were often not prepared in accordance with the religious  
34  
35 or cultural beliefs of patients.[37, 51, 55, 71] Several studies described the affect generated  
36  
37 through the object of the body bag or the physical preparation of dead bodies in accordance  
38  
39 with infection control measures[40, 42, 55, 63]: "*When a patient with an infectious disease*  
40  
41 *dies, the body is wrapped in several layers of cloth, packed into two bags, which are sprayed*  
42  
43 *with disinfectant... It is a little hard to accept this form of death.*"[40] One study also  
44  
45 described the emotional labour of a participant who spent multiple full shifts transporting  
46  
47 bodies from hospital beds to the morgue.[38] However, an *absence* of bodies could also  
48  
49 enact the presence of death in the hospital; one study described the experience of dealing  
50  
51 with a shortage of beds one day and arriving at work the next day to see "*rows of empty*  
52  
53  
54  
55  
56  
57  
58  
59  
60

1  
2  
3 *beds.*"[38] Pandemic death thus distinctively emerged in the literature through its material  
4  
5 relations with/in the COVID-19 context.  
6

## 7 8 **DISCUSSION** 9

10 This synthesis demonstrates how material objects, spaces, bodies, and affects entangle in  
11  
12 care environments to facilitate the doing of healthcare. Because the materiality of the  
13  
14 healthcare environment shapes care practices, transformations in the environment (both  
15  
16 intentional and unanticipated) afford differing care experiences, which become 'good,'  
17  
18 'bad,' 'compromised' or 'good-enough' care. This accentuates the importance of considering  
19  
20 the material environment as critical to shaping the quality and delivery of care, especially in  
21  
22 times of emergency and disruption. A systemic approach to care delivery not only sees  
23  
24 adaptation as a means of working around the constraints of the material environment but  
25  
26 demands a need for adaptable environments to enable 'good care' to be done. There is a  
27  
28 tendency to focus on healthcare workers, and their attitudes and practices, as the locus and  
29  
30 focus of change, rather than on the material environments which constrain or potentiate  
31  
32 the care that healthcare workers provide. Our analysis, which has relevance for healthcare  
33  
34 delivery beyond situations of emergency, pushes us towards a more systemic adaptation  
35  
36 and change, from attitudes to materials, from individuals to environments.  
37  
38  
39  
40  
41  
42  
43  
44

### 45 **Materially Bounded Care Environments** 46

47 The studies examined in this qualitative synthesis were conducted within a range of  
48  
49 healthcare delivery settings including hospitals, clinics, hospices, health centres, continuing  
50  
51 care facilities, community or field settings, patient homes, and other out-of-hospital  
52  
53 environments. Across these settings, healthcare was delivered within in-person, virtual, and  
54  
55 hybrid environments. Though these healthcare delivery contexts were typically defined  
56  
57 through architectural (e.g. the hospital building) and technological (e.g. telephone  
58  
59  
60

1  
2  
3 conferencing) mechanisms, such definitions inadequately encompass the spaces in which  
4  
5 healthcare was done. Rather, we find that the boundaries of healthcare environments are  
6  
7 neither solid nor fixed, as care extends in relations between and beyond these spaces.  
8  
9

10 Virtual environments brought healthcare into virtual spaces, but also into the homes  
11  
12 of patients and healthcare workers. Virtual care facilitated new and altered ways of  
13  
14 travelling with and to patients and produced (sometimes unwanted) intimacies: the  
15  
16 healthcare worker was able to 'enter the homes' of patients and develop a different kind of  
17  
18 proximity to that which takes place in a hospital or clinic, but so too could patients and  
19  
20 colleagues enter the homes of healthcare professionals working from home. The latter was  
21  
22 conceptualised as an undesirable intimacy, which was not understood as facilitating 'better'  
23  
24 care. Changes in the care encounter also resulted in new care paths and journeys in ways  
25  
26 that were both enabling and produced capacities for harm. A virtual healthcare consult, for  
27  
28 example, could improve healthcare access for some patients, but produced risks of  
29  
30 overlooked symptoms and postponed healthcare procedures, thus resulting in delayed yet  
31  
32 intensified healthcare needs.  
33  
34  
35  
36  
37  
38  
39

40 While our analysis reveals the ways in which the spaces of healthcare have spilled  
41  
42 out beyond healthcare settings, it also identifies more localised spaces and encounters as  
43  
44 sites of care. Restrictions on visitors and healthcare practices drew attention to sites such as  
45  
46 the bedside, which is normatively understood as a place where care happens. In this context  
47  
48 the bedside is a site of *touch* and *presence*, both of which were conceptualised in the  
49  
50 literature as modes of care practice that also facilitated certainty (e.g. physical examinations  
51  
52 as a way of 'being sure' in care decisions). Negotiating the materiality of the healthcare  
53  
54 environment thus became a crucial part of adapted care practice in the pandemic context.  
55  
56 Barriers to touch and presence, produced via alterations in zoning, PPE, care schedules, and  
57  
58  
59  
60

1  
2  
3 modes of communication, simultaneously enabled and constrained 'good' and 'safe' care.  
4  
5 As touch between bodies became 'risky,' barriers to touch and presence, such as PPE and  
6  
7 zoning, enabled care to be done. However, these adaptations in the care environment  
8  
9 generated new risks, as they were also understood as producing 'compromised' care. Virtual  
10  
11 care environments, communication technologies (e.g. whiteboards, radios), hybrid  
12  
13 consultations, and other material innovations (e.g. decorated PPE) produced new  
14  
15 proximities between healthcare worker and patient, thus enabling care to be done  
16  
17 differently.  
18  
19  
20  
21  
22

### 23 **Extending Relations of Care**

24  
25 Our analysis shows that spatial and temporal constraints in healthcare systems are both  
26  
27 created by and navigated through adaptive material practices, which produce 'rippling  
28  
29 effects' beyond the individual care encounter. For example, hospital infection control  
30  
31 protocols led to changes in hospital zoning, which revealed constraints in the resourcing of  
32  
33 staff, PPE, and other equipment. Individual adaptations in response to these constraints  
34  
35 included healthcare workers reusing PPE, skipping breaks, and spending less time with  
36  
37 patients. In contrast, adaptations that attended to the spatial or temporal features of the  
38  
39 material environment allowed for differing ways of doing care. Examples included creating  
40  
41 schedules to facilitate care clustering, developing hybrid consult systems, and implementing  
42  
43 the use of objects such as grab bags, trolleys, and radios. These adaptations allowed for  
44  
45 altered ways of moving and relating within the hospital, in turn producing new care spaces  
46  
47 and care journeys.  
48  
49  
50  
51  
52

53  
54 Our mapping of the extending relations of the COVID-19 care environment allows us  
55  
56 to understand the ways through which local care practices—and how these are shaped by  
57  
58 the materiality of care environments—are themselves located in, and shaped by, broader  
59  
60

1  
2  
3 health systems and ecologies. We saw this, for instance, in how the rippling effects of virtual  
4 care encounters impacted upon hospital emergency departments, and how 'experiential  
5 evidence' from geographically distant COVID-19 'hot areas' was shared through informal  
6 virtual networks and tested in local care environments. Our analysis also points to the ways  
7 in which healthcare workers mediated their experiences and knowledge of COVID-19 care  
8 through engagement with a global pandemic imaginary. For example, a site of emotional  
9 trauma in a hospital might be enclosed by the four walls of a ward and tied to a single event,  
10 but this trauma became known through its relations with broader temporal and global  
11 pandemic uncertainties. The affects generated in and through the care environment  
12 facilitated other forms of knowing as well; (double) body bags, empty beds, social media  
13 posts, news media images, and practices of infection control in corpse management all  
14 enacted a knowing of pandemic death, distinct from other forms of death in healthcare  
15 work. These findings highlight how locally materialised affects and experiences of care  
16 connect with broader, as well as global, affects and adaptations generated by pandemic.

### 37 **Implications for Future Research and Practice**

38  
39 A pervasive orientation in the literature is emphasising what is absent, or deficient, in care  
40 environments. Our analysis, however, testifies to a responsiveness and ingenuity in how  
41 healthcare workers and services have adapted within constraining and disruptive care  
42 relations to make care environments work in the face of emergency. In turn, our findings  
43 emphasise a need for care environments themselves to be made more adaptable and  
44 malleable, such that these adaptive potentials can come together to enable 'good' care in  
45 times of uncertainty and change. The insights produced through this synthesis thus  
46 explicate how and why we might better attend to the material spaces, objects, practices,  
47 and affects through which healthcare environments are made (and made differently). This  
48  
49  
50  
51  
52  
53  
54  
55  
56  
57  
58  
59  
60



1  
2  
3 has practical implications for the building of resilient, responsive, and enabling care  
4  
5 environments. We highlight five implications:

- 6  
7  
8 • While the COVID-19 context calls attention to the consequences of insufficiently  
9  
10 flexible healthcare systems, the materiality of care environments is always in the  
11  
12 process of adapting what care is made possible. This gives us insights to build upon,  
13  
14 including for considering how good care is made possible, even in situations of risk  
15  
16 and constraint.
- 17  
18  
19 • Interventions for optimising good and better care delivery need to move beyond a  
20  
21 focus on individual practices and better attend to the effects of the material  
22  
23 environment and how this enables or constrains care.
- 24  
25  
26 • Interventions can capitalise on the fluid boundaries of care environments which  
27  
28 extend beyond local spaces and buildings to connect with more distant as well as  
29  
30 virtual care experiences.
- 31  
32  
33 • Optimising the material care environment to deliver good care, especially in times of  
34  
35 emergency, requires learning from everyday adaptive practices in healthcare  
36  
37 experience, while making material environments more adaptable.
- 38  
39  
40 • Mapping how the material effects of healthcare 'ripple out' beyond individual  
41  
42 encounters and beyond particular healthcare environments is an important first step  
43  
44 to designing a more systemic and ecological approach to care.  
45  
46  
47  
48

49  
50 Thus, in addition to synthesising material adaptations in care environments from within the  
51  
52 specific context of the early COVID-19 pandemic and demonstrating the importance of  
53  
54 noticing these material adaptations, our analysis models interpretive methods which can be  
55  
56 used in future research and appraisal of healthcare systems, during times of emergency and  
57  
58 beyond.  
59  
60

## Strengths and Limitations

The approach we have developed for critical interpretive synthesis (adapted from that proposed by Dixon-Woods et al.[30]) has produced a versatile yet readily comprehensible method for reviewing complex, diverse, and emerging data. We suggest that this method be taken up in the development of future protocols for qualitative review. Given the critical interpretive synthesis approach of our review, this paper is not intended as an exhaustive account of the literature. The strengths of critical interpretive synthesis lie in its capacity to undertake complex analyses of diverse qualitative data, develop insights that move beyond the goals of the original studies, and generate theory that has applicability to both research and practice. Our purposive sampling strategy facilitates these goals through a highly critical and iterative approach to inclusion. It is possible that relevant literature could be missed within this strategy, however our more flexible and inclusive approach to literature searching in the earlier phases of sampling also make it more likely that papers have been captured that would be missed in conventional systematic review methods. The resulting sample may therefore reflect a broader and more diverse range of experiences.

Given the practical orientation of this synthesis, the insights generated through our mapping of the literature offer a starting point for the development of further theoretical work. While the studies included in this synthesis documented material adaptations in the environment, critical analysis of the material effects of these adaptations was in most cases limited. Future research can contribute to new materialist scholarship investigating how care environments are made through their materials and spaces, and the effects of their making in care knowledges and practices,[20, 21, 23, 25-27, 74, 75] by extending our interpretive approach to noticing how care environments adapt (are *re-made*) in the face of uncertainty and in times of emergency.

1  
2  
3  
4  
5  
6  
7  
8  
9  
10  
11  
12  
13  
14  
15  
16  
17  
18  
19  
20  
21  
22  
23  
24  
25  
26  
27  
28  
29  
30  
31  
32  
33  
34  
35  
36  
37  
38  
39  
40  
41  
42  
43  
44  
45  
46  
47  
48  
49  
50  
51  
52  
53  
54  
55  
56  
57  
58  
59  
60

There were also some logistical limitations in this synthesis. The global health emergency context of the COVID-19 pandemic resulted in rapid publication of studies across different temporal, geographical, and professional contexts in 2020 and 2021. Though the prominent concerns addressed in this synthesis were found across health contexts, more specific and contextual insights may have been missed. While many publishers have expedited COVID-19-focused studies since the beginning of the pandemic, due to the timing of our writing, the studies included in this synthesis were conducted within the first 18 months of the pandemic (with the majority of data collected in the first 6 months of 2020) and employed methods that could be implemented rapidly, often at a distance, and without producing unnecessary further burden on already-stressed healthcare systems. This resulted in a lack of longitudinal and ethnographic methods (though some papers were linked to larger studies that may include data from such methods). This means that the data assembled through this synthesis were generated via context-specific participant interpretations of the care environment, which have been interpolated by the study authors and via our analysis. Additionally, we have exclusively included studies published in English, as this is the only shared language between the authors.

A final limitation of this synthesis relates to the complexity of defining COVID-19 care. Much of the literature did not distinguish between findings related to COVID-19-specific and non-COVID-19 care, and terms such as 'treatment,' 'therapies,' and 'care' were employed inconsistently in the literature, often without definitions of what these words meant in practice. Many studies implicitly established distinctions between curative medical treatment and symptom management, with the latter framed as care done in the absence of, or while waiting for, 'effective' treatment options. Such a framing presents several issues. First, it delimits the efficacy of supportive care *as care*, and obscures relations

1  
2  
3 between symptom monitoring or management and health outcomes. Second, it sits at odds  
4  
5 with descriptions of informal knowledge sharing networks, which themselves enact an  
6  
7 efficacy in their shared care practices, however limited, incomplete, or uncertain. Put  
8  
9 another way, framing symptom management practices against *lacking* or *unknown* care  
10  
11 practices de-emphasises what care *is already being done* in these contexts. Finally,  
12  
13 reinforcing distinctions between types of care may not make sense in the provision of care,  
14  
15 but instead reveal an artificial separation in clinical practice.  
16  
17  
18  
19

## 20 **CONCLUSIONS**

21  
22 This paper is the first to synthesise qualitative research investigating healthcare workers'  
23  
24 experiences during the COVID-19 pandemic with an aim to explicate how the materiality of  
25  
26 the healthcare environment shapes care delivery. The findings of this paper demonstrate  
27  
28 how the healthcare environment can enable and constrain 'good' care, and how changes in  
29  
30 this environment produce complex and rippling health effects. The insights generated  
31  
32 through this synthesis are valuable in supporting healthcare workers, managers, and  
33  
34 organisations in developing enabling care environments and adapting care practices  
35  
36 through an attention to the materiality of the environment itself.  
37  
38  
39  
40

## 41 **ACKNOWLEDGEMENTS**

42  
43 The Centre for Social Research in Health at the University of New South Wales (UNSW) is  
44  
45 supported by a grant from the Australian Government Department of Health. We are  
46  
47 grateful for support from the UNSW Scientia (Associate Professor Kari Lancaster) and SHARP  
48  
49 (Professor Tim Rhodes) schemes.  
50  
51  
52  
53

## 54 **AUTHOR CONTRIBUTIONS**

55  
56 MH conceptualised and designed the review in consultation with TR and KL. MH conducted  
57  
58 the literature search, screening, full-text review, and data collection and identified emerging  
59  
60

1  
2  
3 themes. TR and KL contributed to the further development of themes and a synthesising  
4  
5 argument was generated through discussion between all authors. MH was responsible for  
6  
7 data analysis, which was refined through discussion with TR and KL. MH drafted the  
8  
9 manuscript. All authors critically revised the manuscript and approved the final version.  
10  
11  
12

### 13 **FUNDING**

14  
15 This research received no specific grant from any funding agency in the public, commercial  
16  
17 or not-for-profit sectors.  
18  
19

### 20 **COMPETING INTERESTS**

21  
22 None declared.  
23  
24

### 25 **DATA AVAILABILITY STATEMENT**

26  
27 Not applicable.  
28  
29

### 30 **ETHICS APPROVAL**

31  
32 Not required—review.  
33  
34  
35  
36  
37  
38  
39  
40  
41  
42  
43  
44  
45  
46  
47  
48  
49  
50  
51  
52  
53  
54  
55  
56  
57  
58  
59  
60

## REFERENCES

1. Vindrola-Padros C, Andrews L, Dowrick A, et al. Perceptions and experiences of healthcare workers during the COVID-19 pandemic in the UK. *BMJ Open* 2020;10(11):e040503. doi: 10.1136/bmjopen-2020-040503
2. Jayasekara JHPRU, Siriwardana CSA, Amaratunga D, et al. Redesigning and Repurposing Healthcare Facilities for the New Normal, COVID-19: A Review on New Approaches in Hospital Systems. In: Dissanayake R, Mendis P, Weerasekera K, et al., eds. *Lecture Notes in Civil Engineering*. Singapore: Springer 2022:211-34.
3. Barach P, Fisher SD, Adams MJ, et al. Disruption of healthcare: Will the COVID pandemic worsen non-COVID outcomes and disease outbreaks? *Prog Pediatr Cardiol* 2020;59:101254. doi: 10.1016/j.ppedcard.2020.101254
4. Langran C, Mantzourani E, Hughes L, et al. "I'm at breaking point"; Exploring pharmacists' resilience, coping and burnout during the COVID-19 pandemic. *Explor Res Clin Soc Pharm* 2022;5:100104. doi: 10.1016/j.rcsop.2022.100104
5. Sheraton M, Deo N, Dutt T, et al. Psychological effects of the COVID 19 pandemic on healthcare workers globally: A systematic review. *Psychiatry Res* 2020;292:113360. doi: 10.1016/j.psychres.2020.113360
6. Koontalay A, Suksatan W, Prabsangob K, et al. Healthcare Workers' Burdens During the COVID-19 Pandemic: A Qualitative Systematic Review. *J Multidiscip Healthc* 2021;14:3015-25. doi: 10.2147/jmdh.S330041
7. Joo JY, Liu MF. Nurses' barriers to caring for patients with COVID-19: a qualitative systematic review. *Int Nurs Rev* 2021;68(2):202-13. doi: 10.1111/inr.12648
8. Whear R, Abbott RA, Bethel A, et al. Impact of COVID-19 and other infectious conditions requiring isolation on the provision of and adaptations to fundamental nursing care in hospital in terms of overall patient experience, care quality, functional ability, and treatment outcomes: systematic review. *J Adv Nurs* 2022;78(1):78-108. doi: 10.1111/jan.15047
9. Danesh MK, Garosi E, Golmohamadpour H. The COVID-19 Pandemic and nursing challenges: A review of the early literature. *Work* 2021;69(1):23-36. doi: 10.3233/wor-213458
10. Turner S, Botero-Tovar N, Herrera MA, et al. Systematic review of experiences and perceptions of key actors and organisations at multiple levels within health systems internationally in responding to COVID-19. *Implement Sci* 2021;16(1):50. doi: 10.1186/s13012-021-01114-2
11. Xu H, Stjernswärd S, Glasdam S. Psychosocial experiences of frontline nurses working in hospital-based settings during the COVID-19 pandemic - A qualitative systematic review. *Int J Nurs Stud Adv* 2021;3:100037. doi: 10.1016/j.ijnsa.2021.100037
12. Aydogdu ALF. Ethical dilemmas experienced by nurses while caring for patients during the Covid-19 pandemic: An integrative review of qualitative studies. *J Nurs Manag* 2022 doi: 10.1111/jonm.13585 [published Online First: 10 March 2022]
13. Billings J, Ching BCF, Gkofa V, et al. Experiences of frontline healthcare workers and their views about support during COVID-19 and previous pandemics: a systematic review and qualitative meta-synthesis. *BMC Health Serv Res* 2021;21(1):923. doi: 10.1186/s12913-021-06917-z

14. Glasdam S, Sandberg H, Stjernswärd S, et al. Nurses' use of social media during the COVID-19 pandemic—A scoping review. *PLoS One* 2022;17(2):e0263502. doi: 10.1371/journal.pone.0263502
15. Huerta-González S, Selva-Medrano D, López-Espuela F, et al. The Psychological Impact of COVID-19 on Front Line Nurses: A Synthesis of Qualitative Evidence. *Int J Environ Res Public Health* 2021;18(24):12975.
16. Riedel P-L, Kreh A, Kulcar V, et al. A Scoping Review of Moral Stressors, Moral Distress and Moral Injury in Healthcare Workers during COVID-19. *Int J Environ Res Public Health* 2022;19(3):1666.
17. Troglia da Silva FC, Neto MLR. Psychiatric disorders in health professionals during the COVID-19 pandemic: A systematic review with meta-analysis. *J Psychiatr Res* 2021;140:474-87. doi: 10.1016/j.jpsychires.2021.03.044
18. Vera San Juan N, Clark SE, Camilleri M, et al. Training and redeployment of healthcare workers to intensive care units (ICUs) during the COVID-19 pandemic: a systematic review. *BMJ Open* 2022;12(1):e050038. doi: 10.1136/bmjopen-2021-050038
19. Sigahi TFAC, Kawasaki BC, Bolis I, et al. A systematic review on the impacts of Covid-19 on work: Contributions and a path forward from the perspectives of ergonomics and psychodynamics of work. *Hum Factors Ergon Manuf* 2021:1-14. doi: 10.1002/hfm.20889 [published Online First: 21 June 2021]
20. Buse C, Martin D, Nettleton S. Conceptualising 'materialities of care': making visible mundane material culture in health and social care contexts. *Sociol Health Illn* 2018;40(2):243-55. doi: 10.1111/1467-9566.12663
21. Latimer J. Afterword: materialities, care, 'ordinary affects', power and politics. *Sociol Health Illn* 2018;40(2):379-91. doi: 10.1111/1467-9566.12678
22. Puig de la Bellacasa M. Matters of care: Speculative ethics in more than human worlds. Minneapolis (MN): U of Minnesota Press 2017.
23. Broom A, Doron A. Resistant bugs, porous borders and ecologies of care in India. *Soc Sci Med* 2022;292:114520. doi: 10.1016/j.socscimed.2021.114520
24. Fox NJ, Alldred P. Sociology and the new materialism: Theory, research, action. London (GB): SAGE Publications 2016.
25. Martin D, Nettleton S, Buse C, et al. Architecture and health care: a place for sociology. *Sociol Health Illn* 2015;37(7):1007-22. doi: 10.1111/1467-9566.12284
26. Brown N, Buse C, Lewis A, et al. Air care: an 'aerography' of breath, buildings and bugs in the cystic fibrosis clinic. *Sociol Health Illn* 2020;42(5):972-86. doi: 10.1111/1467-9566.13104
27. Pink S, Duque M, Sumartojo S, et al. Making Spaces for Staff Breaks: A Design Anthropology Approach. *HERD* 2020;13(2):243-55. doi: 10.1177/1937586719900954
28. Duff C. Exploring the role of 'enabling places' in promoting recovery from mental illness: A qualitative test of a relational model. *Health Place* 2012;18(6):1388-95. doi: 10.1016/j.healthplace.2012.07.003
29. Fox NJ, Powell K. Non-human matter, health disparities and a thousand tiny dis/advantages. *Sociol Health Illn* 2021;43(3):779-95. doi: 10.1111/1467-9566.13265
30. Dixon-Woods M, Cavers D, Agarwal S, et al. Conducting a critical interpretive synthesis of the literature on access to healthcare by vulnerable groups. *BMC Med Res Methodol* 2006;6(1):35. doi: 10.1186/1471-2288-6-35



- 1
- 2
- 3
- 4 31. Booth A. Harnessing Energies, Resolving Tensions: Acknowledging a Dual Heritage for
- 5 Qualitative Evidence Synthesis. *Qual Health Res* 2019;29(1):18-31. doi:
- 6 10.1177/1049732318808247
- 7 32. Booth A, Carroll C, Ilott I, et al. Desperately Seeking Dissonance: Identifying the
- 8 Disconfirming Case in Qualitative Evidence Synthesis. *Qual Health Res*
- 9 2013;23(1):126-41. doi: 10.1177/1049732312466295
- 10 33. Barnett-Page E, Thomas J. Methods for the synthesis of qualitative research: a critical
- 11 review. *BMC Med Res Methodol* 2009;9(1):59. doi: 10.1186/1471-2288-9-59
- 12 34. Greenhalgh T, Peacock R. Effectiveness and efficiency of search methods in systematic
- 13 reviews of complex evidence: audit of primary sources. *BMJ* 2005;331(7524):1064-
- 14 65. doi: 10.1136/bmj.38636.593461.68
- 15 35. Thomas J, Harden A. Methods for the thematic synthesis of qualitative research in
- 16 systematic reviews. *BMC Med Res Methodol* 2008;8(1):45. doi: 10.1186/1471-2288-
- 17 8-45
- 18 36. Conlon C, McDonnell T, Barrett M, et al. The impact of the COVID-19 pandemic on child
- 19 health and the provision of Care in Paediatric Emergency Departments: a qualitative
- 20 study of frontline emergency care staff. *BMC Health Serv Res* 2021;21(1):279. doi:
- 21 10.1186/s12913-021-06284-9
- 22 37. Al Ghafri T, Al Ajmi F, Anwar H, et al. The Experiences and Perceptions of Health-Care
- 23 Workers During the COVID-19 Pandemic in Muscat, Oman: A Qualitative Study. *J*
- 24 *Prim Care Community Health* 2020;11 doi: 10.1177/2150132720967514
- 25 38. Blake H, Gupta A, Javed M, et al. COVID-Well Study: Qualitative Evaluation of Supported
- 26 Wellbeing Centres and Psychological First Aid for Healthcare Workers during the
- 27 COVID-19 Pandemic. *Int J Environ Res Public Health* 2021;18(7):3626. doi:
- 28 10.3390/ijerph18073626
- 29 39. Butler CR, Wong SPY, Wightman AG, et al. US Clinicians' Experiences and Perspectives on
- 30 Resource Limitation and Patient Care During the COVID-19 Pandemic. *JAMA Netw*
- 31 *Open* 2020;3(11):e2027315. doi: 10.1001/jamanetworkopen.2020.27315
- 32 40. Liu Q, Luo D, Haase JE, et al. The experiences of health-care providers during the COVID-
- 33 19 crisis in China: a qualitative study. *Lancet Glob Health* 2020;8(6):e790-e98. doi:
- 34 10.1016/S2214-109X(20)30204-7
- 35 41. Palacios-Ceña D, Fernández-de-las-Peñas C, Palacios-Ceña M, et al. Working on the
- 36 Frontlines of the COVID-19 Pandemic: A Qualitative Study of Physical Therapists'
- 37 Experience in Spain. *Phys Ther* 2021;101(4):1-9. doi: 10.1093/ptj/pzab025
- 38 42. Arnetz JE, Goetz CM, Arnetz BB, et al. Nurse reports of stressful situations during the
- 39 COVID-19 pandemic: qualitative analysis of survey responses. *Int J Environ Res Public*
- 40 *Health* 2020;17(21):8126. doi: 10.3390/ijerph17218126
- 41 43. Digby R, Winton-Brown T, Finlayson F, et al. Hospital staff well-being during the first
- 42 wave of COVID-19: Staff perspectives. *Int J Ment Health Nurs* 2021;30(2):440-50. doi:
- 43 10.1111/inm.12804
- 44 44. Newman KL, Jeve Y, Majumder P. Experiences and emotional strain of NHS frontline
- 45 workers during the peak of the COVID19 pandemic. *Int J Soc Psychiatry* 2021:1-8.
- 46 doi: 10.1177/00207640211006153 [published Online First: 13 April 2021]
- 47 45. Baldwin S, George J. Qualitative study of UK health professionals' experiences of working
- 48 at the point of care during the COVID-19 pandemic. *BMJ Open* 2021;11(9):e054377.
- 49 doi: 10.1136/bmjopen-2021-054377
- 50
- 51
- 52
- 53
- 54
- 55
- 56
- 57
- 58
- 59
- 60



- 1
- 2
- 3
- 4 46. Hoernke K, Djellouli N, Andrews L, et al. Frontline healthcare workers' experiences with
- 5 personal protective equipment during the COVID-19 pandemic in the UK: a rapid
- 6 qualitative appraisal. *BMJ Open* 2021;11(1):e046199. doi: 10.1136/bmjopen-2020-
- 7 046199
- 8
- 9 47. Parsons Leigh J, Kemp LG, de Groot C, et al. A qualitative study of physician perceptions
- 10 and experiences of caring for critically ill patients in the context of resource strain
- 11 during the first wave of the COVID-19 pandemic. *BMC Health Serv Res*
- 12 2021;21(1):374. doi: 10.1186/s12913-021-06393-5
- 13
- 14 48. Liberati E, Richards N, Willars J, et al. A qualitative study of experiences of NHS mental
- 15 healthcare workers during the Covid-19 pandemic. *BMC Psychiatry* 2021;21(1):250.
- 16 doi: 10.1186/s12888-021-03261-8
- 17
- 18 49. Hayirli TC, Stark N, Bhanja A, et al. Masked and distanced: a qualitative study of how
- 19 personal protective equipment and distancing affect teamwork in emergency care.
- 20 *Int J Qual Health Care* 2021;33(2):1-6. doi: 10.1093/intqhc/mzab069
- 21
- 22 50. Saleem J, Ishaq M, Zakar R, et al. Experiences of frontline Pakistani emigrant physicians
- 23 combating COVID-19 in the United Kingdom: a qualitative phenomenological
- 24 analysis. *BMC Health Serv Res* 2021;21(1):291. doi: 10.1186/s12913-021-06308-4
- 25
- 26 51. Chandler-Jeanville S, Nohra RG, Loizeau V, et al. Perceptions and Experiences of the
- 27 COVID-19 Pandemic amongst Frontline Nurses and Their Relatives in France in Six
- 28 Paradoxes: A Qualitative Study. *Int J Environ Res Public Health* 2021;18(13):6977. doi:
- 29 10.3390/ijerph18136977
- 30
- 31 52. Deliktas Demirci A, Oruc M, Kabukcuoglu K. 'It was difficult, but our struggle to touch
- 32 lives gave us strength': The experience of nurses working on COVID-19 wards. *J Clin*
- 33 *Nurs* 2021;30(5-6):732-41. doi: 10.1111/jocn.15602
- 34
- 35 53. Rao H, Mancini D, Tong A, et al. Frontline interdisciplinary clinician perspectives on
- 36 caring for patients with COVID-19: a qualitative study. *BMJ Open*
- 37 2021;11(5):e048712. doi: 10.1136/bmjopen-2021-048712
- 38
- 39 54. Williams Veazey L, Broom A, Kenny K, et al. Entanglements of affect, space, and
- 40 evidence in pandemic healthcare: An analysis of Australian healthcare workers'
- 41 experiences of COVID-19. *Health Place* 2021;72:102693. doi:
- 42 10.1016/j.healthplace.2021.102693
- 43
- 44 55. Testoni I, Franco C, Gallo Stampino E, et al. Facing COVID-19 Between Sensory and
- 45 Psychoemotional Stress, and Instrumental Deprivation: A Qualitative Study of
- 46 Unmanageable Critical Incidents With Doctors and Nurses in Two Hospitals in
- 47 Northern Italy. *Front Psychol* 2021;12(622894):1-13. doi: 10.3389/fpsyg.2021.622894
- 48
- 49 56. Pastrana T, De Lima L, Pettus K, et al. The impact of COVID-19 on palliative care workers
- 50 across the world: A qualitative analysis of responses to open-ended questions.
- 51 *Palliat Support Care* 2021:1-6. doi: 10.1017/S1478951521000298 [published Online
- 52 First: 2 March 2021]
- 53
- 54 57. Banerjee D, Vajawat B, Varshney P, et al. Perceptions, Experiences, and Challenges of
- 55 Physicians Involved in Dementia Care During the COVID-19 Lockdown in India: A
- 56 Qualitative Study. *Front Psychiatry* 2020;11:615758. doi: 10.3389/fpsyg.2020.615758
- 57
- 58 58. Kurotschka PK, Serafini A, Demontis M, et al. General Practitioners' Experiences During
- 59 the First Phase of the COVID-19 Pandemic in Italy: A Critical Incident Technique
- 60 Study. *Front Public Health* 2021;9:623904. doi: 10.3389/fpubh.2021.623904
- 61
- 62 59. Yip YC, Yip KH, Tsui WK. The Transformational Experience of Junior Nurses Resulting
- 63 from Providing Care to COVID-19 Patients: From Facing Hurdles to Achieving

- Psychological Growth. *Int J Environ Res Public Health* 2021;18(14):7383. doi: 10.3390/ijerph18147383
60. Ross AM, Schneider S, Muneton-Castano YF, et al. "You never stop being a social worker." Experiences of pediatric hospital social workers during the acute phase of the COVID-19 pandemic. *Soc Work Health Care* 2021;60(1):8-29. doi: 10.1080/00981389.2021.1885565
61. Aughterson H, McKinlay AR, Fancourt D, et al. Psychosocial impact on frontline health and social care professionals in the UK during the COVID-19 pandemic: a qualitative interview study. *BMJ Open* 2021;11(2):e047353. doi: 10.1136/bmjopen-2020-047353
62. Cheong MWL. "To be or not to be in the ward": The impact of COVID-19 on the role of hospital-based clinical pharmacists—A qualitative study. *J Am Coll Clin Pharm* 2020;3:1458-63. doi: 10.1002/jac5.1315
63. Montgomery CM, Humphreys S, McCulloch C, et al. Critical care work during COVID-19: a qualitative study of staff experiences in the UK. *BMJ Open* 2021;11(5):e048124. doi: 10.1136/bmjopen-2020-048124
64. Billings J, Biggs C, Ching BCF, et al. Experiences of mental health professionals supporting front-line health and social care workers during COVID-19: qualitative study. *BJPsych Open* 2021;7(2):e70. doi: 10.1192/bjo.2021.29
65. Norful AA, Rosenfeld A, Schroeder K, et al. Primary drivers and psychological manifestations of stress in frontline healthcare workforce during the initial COVID-19 outbreak in the United States. *Gen Hosp Psychiatry* 2021;69:20-26. doi: 10.1016/j.genhosppsych.2021.01.001
66. Rees N, Smythe L, Hogan C, et al. Paramedic experiences of providing care in wales (UK) during the 2020 COVID-19 pandemic (PECC-19): a qualitative study using evolved grounded theory. *BMJ Open* 2021;11(6):e048677. doi: 10.1136/bmjopen-2021-048677
67. Chen F, Zang Y, Liu Y, et al. Dispatched nurses' experience of wearing full gear personal protective equipment to care for COVID-19 patients in China-A descriptive qualitative study. *J Clin Nurs* 2021;30(13-14):2001-14. doi: 10.1111/jocn.15753
68. Crowe S, Howard AF, Vanderspank-Wright B, et al. The effect of COVID-19 pandemic on the mental health of Canadian critical care nurses providing patient care during the early phase pandemic: A mixed method study. *Intensive Crit Care Nurs* 2021;63:102999. doi: 10.1016/j.iccn.2020.102999
69. Ness MM, Saylor J, Di Fusco LA, et al. Healthcare providers' challenges during the coronavirus disease (COVID-19) pandemic: A qualitative approach. *Nurs Health Sci* 2021;23(2):389-97. doi: 10.1111/nhs.12820
70. Fernández-Castillo RJ, González-Caro MD, Fernández-García E, et al. Intensive care nurses' experiences during the COVID-19 pandemic: A qualitative study. *Nurs Crit Care* 2021:1-10. doi: 10.1111/nicc.12589 [published Online First: 6 January 2021]
71. Galehdar N, Kamran A, Toulabi T, et al. Exploring nurses' experiences of psychological distress during care of patients with COVID-19: a qualitative study. *BMC Psychiatry* 2020;20(1):489. doi: 10.1186/s12888-020-02898-1
72. Sheng Q, Zhang X, Wang X, et al. The influence of experiences of involvement in the COVID-19 rescue task on the professional identity among Chinese nurses: A qualitative study. *J Nurs Manag* 2020;28(7):1662-69. doi: 10.1111/jonm.13122
73. Jia Y, Chen O, Xiao Z, et al. Nurses' ethical challenges caring for people with COVID-19: A qualitative study. *Nurs Ethics* 2021;28(1):33-45. doi: 10.1177/0969733020944453

- 1  
2  
3 74. Hooker C, Hor S, Wyer M, et al. Trajectories of hospital infection control: Using non-  
4 representational theory to understand and improve infection prevention and  
5 control. *Soc Sci Med* 2020;256:113023. doi: 10.1016/j.socscimed.2020.113023  
6  
7 75. Pink S, Morgan J, Dainty A. The safe hand: Gels, water, gloves and the materiality of  
8 tactile knowing. *J Mater Cult* 2014;19(4):425-42. doi: 10.1177/1359183514555053  
9  
10  
11  
12  
13  
14  
15  
16  
17  
18  
19  
20  
21  
22  
23  
24  
25  
26  
27  
28  
29  
30  
31  
32  
33  
34  
35  
36  
37  
38  
39  
40  
41  
42  
43  
44  
45  
46  
47  
48  
49  
50  
51  
52  
53  
54  
55  
56  
57  
58  
59  
60

For peer review only
